# Supplementary material for: Theoretical mechanism studies on the competitive CO-induced N–N bond cleavage of N2O with N–O bond cleavage mediated by (η5-C5Me5)Mo[N(iPr)C(Me)N(iPr)](CO)2
Source: Royal Society of Chemistry journal article supplement (doi:10.1039/c3dt51629f), 2013-01-01
Supplement: c3dt51629f.pdf [file c3dt51629f.pdf]

## *Supporting Information*

**Theoretical mechanism studies on the competitive CO-induced N-N bond cleavage of N<sub>2</sub>O with N-O bond cleavage mediated by ( $\eta^5$ -C<sub>5</sub>Me<sub>5</sub>)Mo[N(<sup>i</sup>Pr)C(Me)N(<sup>i</sup>Pr)](CO)<sub>2</sub>**

**Nan Lu\* and Huatian Wang\***

*College of Chemistry and Material Science, Shandong Agricultural University, Taian  
City 271018, Shandong Prov. P. R. China*

## Full Gaussian 09 Reference

Gaussian 09, Revision B.01, M. J. Frisch, G. W. Trucks, H. B. Schlegel, G. E. Scuseria, M. A. Robb, J. R. Cheeseman, G. Scalmani, V. Barone, B. Mennucci, G. A. Petersson, H. Nakatsuji, M. Caricato, X. Li, H. P. Hratchian, A. F. Izmaylov, J. Bloino, G. Zheng, J. L. Sonnenberg, M. Hada, M. Ehara, K. Toyota, R. Fukuda, J. Hasegawa, M. Ishida, T. Nakajima, Y. Honda, O. Kitao, H. Nakai, T. Vreven, J. A. Montgomery, Jr., J. E. Peralta, F. Ogliaro, M. Bearpark, J. J. Heyd, E. Brothers, K. N. Kudin, V. N. Staroverov, R. Kobayashi, J. Normand, K. Raghavachari, A. Rendell, J. C. Burant, S. S. Iyengar, J. Tomasi, M. Cossi, N. Rega, J. M. Millam, M. Klene, J. E. Knox, J. B. Cross, V. Bakken, C. Adamo, J. Jaramillo, R. Gomperts, R. E. Stratmann, O. Yazyev, A. J. Austin, R. Cammi, C. Pomelli, J. W. Ochterski, R. L. Martin, K. Morokuma, V. G. Zakrzewski, G. A. Voth, P. Salvador, J. J. Dannenberg, S. Dapprich, A. D. Daniels, Ö. Farkas, J. B. Foresman, J. V. Ortiz, J. Cioslowski, and D. J. Fox, Gaussian, Inc., Wallingford, CT, 2009.

## Theoretical Calculations.

All calculations were carried out using DFT as implemented in Gaussian 09. We chose to use the popular B3LYP functional, which includes Becke's three-parameter hybrid functional combined with the Lee–Yang–Parr correction for correlation. The standard 6-31G(d,p) basis set was used for H, C, N, and O atoms, while the effective core potentials (ECPs) of Hay and Wadt were combined with double- $\zeta$  valence basis sets (LanL2DZ) for Molybdenum. All structures studied in this paper were optimized. Frequencies were analyzed at the same level to characterize the nature of stationary points (energy minima or first-order saddle-points) and to provide free energies at 298.15 K and 1 atm pressure, which include entropic contributions by considering the vibrations, rotations, and translations of the structures. When necessary, the intrinsic reaction coordinate (IRC) calculations were performed to verify the right connections among a transition state and its forward, backward minima.

To consider the solvent effect on reaction, single-point calculations with self-consistent reaction field based on the integral equation formalism polarizable continuum model (IEFPCM) with UAKS radii and cavity-dispersion-solvent-structure terms in Truhlar and co-workers' SMD solvation model for benzene were applied for all gas-phase optimized structures at B3LYP/6-311++G(d,p) level. For all cited energies, ZPE corrections were taken into account. In order to evaluate the direction and magnitude of the donor–acceptor interactions for some stationary points, natural bond orbital (NBO) analysis was also performed. The Los Alamos National Laboratory 2-Double-Zeta (LanL2DZ) basis set was used for the Mo atom, and the other atoms were computed with 6-311++G(d,p) basis sets.

**Table S1** Calculated relative energies (all in kcal mol<sup>-1</sup>, relative to **Cat-B**+N<sub>2</sub>O) for the ZPE-corrected Gibbs free energies ( $\Delta G_{\text{gas}}$ ), relative solvation energies ( $\Delta G_{\text{solv}}$ ) and Gibbs free energies ( $\Delta G_{\text{sol}}$ ) for all species in benzene at 298 K by B3LYP/6-311++G(d,p)//B3LYP/6-31G(d,p) method.

| Species                                                       | $\Delta G_{\text{gas}}$ | $\Delta G_{\text{sol}}$ | $\Delta G_{\text{solv}}$ |
|---------------------------------------------------------------|-------------------------|-------------------------|--------------------------|
| 1/2 <b>Cat-A</b> + 2CO – 1/2N <sub>2</sub> + N <sub>2</sub> O | -274.9                  | -289.4                  | 4.5                      |
| <b>Cat-B</b> + N <sub>2</sub> O                               | 0.0                     | -19.0                   | 0.0                      |
| <b>Int0</b> + N <sub>2</sub> O                                | 37.2                    | 17.9                    | -0.2                     |
| <b>Int1</b> + CO                                              | 39.1                    | 21.1                    | 0.9                      |
| <b>TS1</b> + CO                                               | 49.5                    | 34.2                    | 3.7                      |
| <b>Int2</b> + CO                                              | -33.7                   | -48.4                   | 4.3                      |
| <b>TS2</b> + CO                                               | -23.0                   | -37.4                   | 4.6                      |
| <b>Int3</b> + CO                                              | -40.0                   | -54.0                   | 4.9                      |
| <b>Int4</b> + CO + N <sub>2</sub>                             | -48.2                   | -62.2                   | 5.0                      |
| <b>TS3</b> + CO + N <sub>2</sub>                              | -36.2                   | -50.8                   | 4.4                      |
| <b>Int5</b> + CO + N <sub>2</sub>                             | -43.1                   | -59.9                   | 2.2                      |
| <b>TS4</b> + CO + N <sub>2</sub>                              | -22.4                   | -39.4                   | 1.9                      |
| <b>Int6</b> + CO + N <sub>2</sub>                             | -39.7                   | -59.3                   | 0.6                      |
| <b>Int7</b> + N <sub>2</sub>                                  | -32.6                   | -51.9                   | -0.3                     |
| <b>TS5</b> + N <sub>2</sub>                                   | -20.7                   | -40.6                   | -0.9                     |
| <b>Int8</b> + N <sub>2</sub>                                  | -48.0                   | -66.5                   | 0.4                      |
| <b>TS6</b> + N <sub>2</sub>                                   | -47.1                   | -63.6                   | 2.5                      |
| <b>Int9</b> + N <sub>2</sub>                                  | -18.5                   | -65.1                   | 2.4                      |
| <b>TS7</b> + CO                                               | 46.2                    | 29.0                    | 1.7                      |
| <b>Int10</b> + CO                                             | 27.7                    | 10.4                    | 1.7                      |
| <b>TS8</b> + CO                                               | 58.2                    | 36.9                    | -2.2                     |
| <b>Int11</b> + CO                                             | 54.6                    | 33.1                    | -2.5                     |
| <b>TS9</b> + CO                                               | 85.5                    | 66.9                    | 0.5                      |
| <b>TS10</b> + CO                                              | 66.7                    | 50.2                    | 2.5                      |
| <b>Int12</b> + CO                                             | 19.2                    | 1.5                     | 1.2                      |
| <b>Int13</b> + CO                                             | -14.4                   | -34.9                   | -1.6                     |

**Table S2** The donor–acceptor orbital interactions and their second-order perturbation stabilization energies ( $\Delta E_{i,j}^{(2)}$ )

|             | Bond          | Donor       | Acceptor    | Interaction                   | $\Delta E_{i,j}^{(2)}$<br>(kcal mol <sup>-1</sup> ) |
|-------------|---------------|-------------|-------------|-------------------------------|-----------------------------------------------------|
| <b>TS1</b>  | N1-N2...O1    | BD(1)N1-N2  | RY*(3)O1    | $\sigma \rightarrow n^*$      | 1.3                                                 |
|             | O1...Mo       | LP(1)O1     | LP*(2)Mo    | $n \rightarrow n^*$           | 6.8                                                 |
|             | N1...N2-O1    | LP(1)N1     | BD*(1)N2-O1 | $n \rightarrow \sigma^*$      | 11.0                                                |
| <b>TS7</b>  | N2-N1...Mo    | BD(1)N2-N1  | LP*(3)Mo    | $\sigma \rightarrow n^*$      | 3.6                                                 |
|             | O1-N2...N2-N1 | BD(1)O1-N2  | BD*(1)N2-N1 | $\sigma \rightarrow \sigma^*$ | 2.8                                                 |
| <b>TS10</b> | C1-N1...N2    | BD (3)C1-N1 | RY*(3)N2    | $\sigma \rightarrow n^*$      | 2.2                                                 |
|             | O1-N2...N1    | BD(1)O1-N2  | RY*(1)N1    | $\sigma \rightarrow n^*$      | 2.0                                                 |
|             | O2-C1...C1-N1 | BD(1)O2-C1  | BD*(1)C1-N1 | $\sigma \rightarrow \sigma^*$ | 139.8                                               |

**Fig. S1** Evolution of the energy changes along the IRC for (a) **TS1** (b) **TS7** (c) **TS8** (d) **TS10** and with Scan calculation along (e) Mo-C bond in **Cat-B** (f) Mo-N2 bond in **Int13** at B3LYP/6-31G(d,p) level.

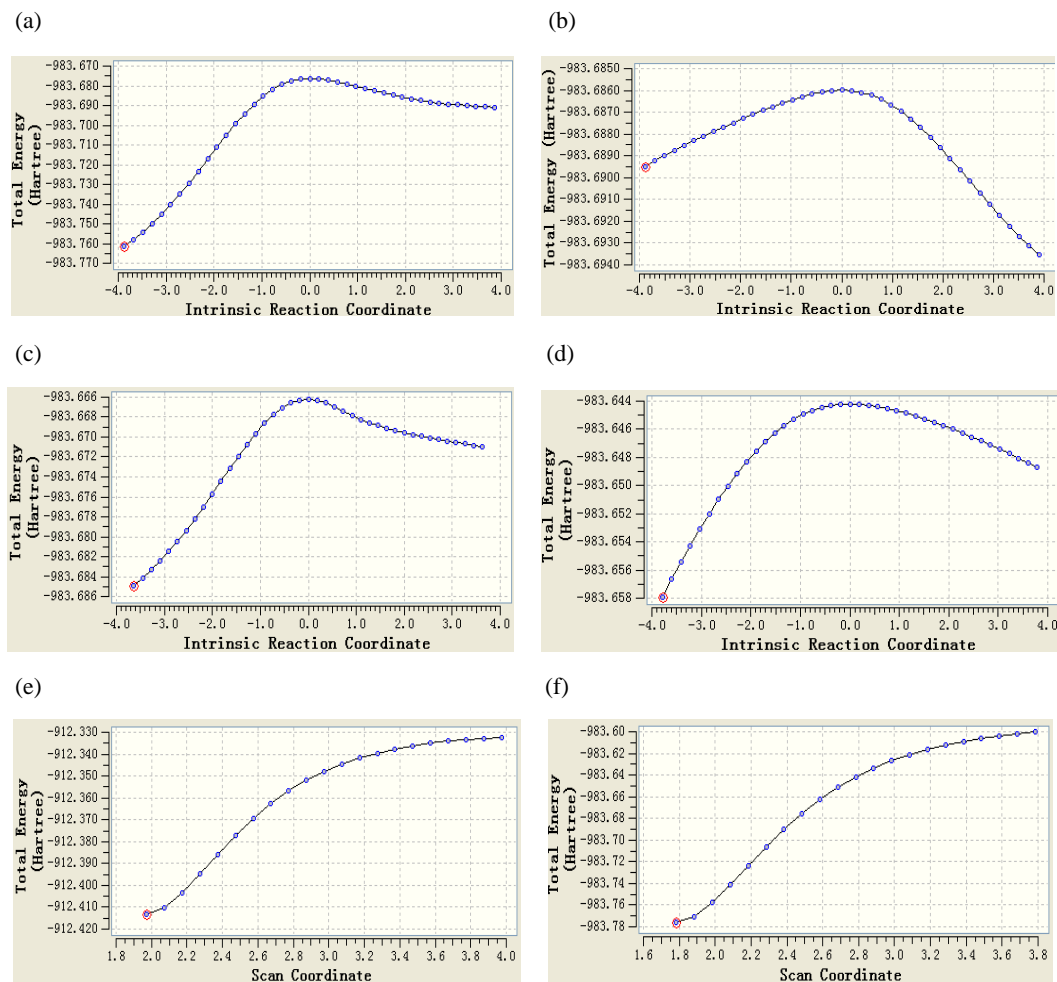

**Fig. S2** Optimized structures and selected geometric parameters of **Int4** and **Int7**.

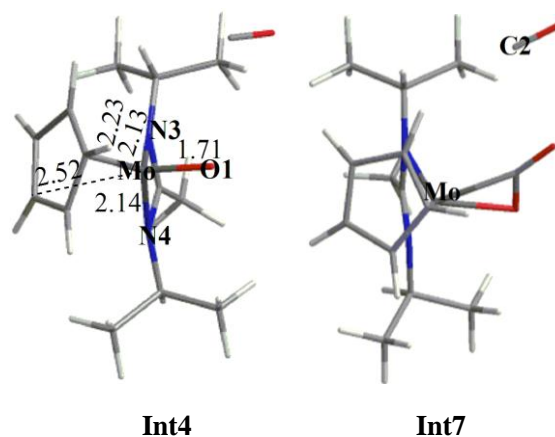

### Optimized Cartesian coordinates (in Å)

#### Optimized Cartesian coordinates for **Cat-A**.

| Center<br>Number | Atomic<br>Number | Atomic<br>Type | Coordinates (Angstroms) |           |           |
|------------------|------------------|----------------|-------------------------|-----------|-----------|
|                  |                  |                | X                       | Y         | Z         |
| 1                | 6                | 0              | -4.320539               | 1.080442  | -2.084450 |
| 2                | 6                | 0              | -4.161551               | 2.197727  | -1.244150 |
| 3                | 6                | 0              | -2.850283               | 2.734718  | -1.425599 |
| 4                | 6                | 0              | -2.205991               | 1.919903  | -2.421687 |
| 5                | 6                | 0              | -3.113204               | 0.877787  | -2.824072 |
| 6                | 1                | 0              | -5.190635               | 0.436912  | -2.115894 |
| 7                | 1                | 0              | -4.889099               | 2.549050  | -0.524128 |
| 8                | 1                | 0              | -2.460923               | 3.638174  | -0.977167 |
| 9                | 1                | 0              | -1.218603               | 2.088848  | -2.832756 |
| 10               | 1                | 0              | -2.957798               | 0.149723  | -3.608339 |
| 11               | 42               | 0              | -2.363764               | 0.564386  | -0.625069 |
| 12               | 7                | 0              | -3.400049               | -1.214993 | 0.007978  |
| 13               | 7                | 0              | -3.176888               | 0.463693  | 1.380443  |
| 14               | 6                | 0              | -3.656430               | -2.523662 | -0.585620 |
| 15               | 6                | 0              | -5.147660               | -2.911367 | -0.608719 |
| 16               | 6                | 0              | -3.126676               | 1.220513  | 2.623702  |
| 17               | 6                | 0              | -3.865963               | 2.558140  | 2.475338  |
| 18               | 6                | 0              | -3.580850               | -0.802994 | 1.264212  |
| 19               | 6                | 0              | -4.124581               | -1.619687 | 2.418744  |
| 20               | 6                | 0              | -2.764205               | -3.639604 | -0.009940 |
| 21               | 6                | 0              | -1.670704               | 1.439914  | 3.064144  |
| 22               | 7                | 0              | -0.612273               | 0.131109  | -0.450469 |
| 23               | 7                | 0              | 0.610767                | -0.125484 | -0.447970 |
| 24               | 1                | 0              | -3.355029               | -2.397555 | -1.631764 |
| 25               | 1                | 0              | -5.295104               | -3.806397 | -1.224995 |
| 26               | 1                | 0              | -5.745930               | -2.099661 | -1.036851 |
| 27               | 1                | 0              | -5.544332               | -3.131035 | 0.388399  |
| 28               | 1                | 0              | -3.635742               | 0.648058  | 3.412426  |
| 29               | 1                | 0              | -3.841460               | 3.121122  | 3.415963  |
| 30               | 1                | 0              | -4.913762               | 2.396636  | 2.197927  |
| 31               | 1                | 0              | -3.395010               | 3.168544  | 1.697267  |
| 32               | 1                | 0              | -4.983355               | -1.116023 | 2.876256  |
| 33               | 1                | 0              | -3.359609               | -1.736619 | 3.194942  |
| 34               | 1                | 0              | -4.439827               | -2.611510 | 2.100991  |
| 35               | 1                | 0              | -2.876442               | -4.558138 | -0.598932 |
| 36               | 1                | 0              | -1.713097               | -3.334850 | -0.043260 |
| 37               | 1                | 0              | -3.015301               | -3.880510 | 1.029019  |

|    |    |   |           |           |           |
|----|----|---|-----------|-----------|-----------|
| 38 | 1  | 0 | -1.160462 | 0.481649  | 3.208940  |
| 39 | 1  | 0 | -1.124657 | 1.994001  | 2.292926  |
| 40 | 1  | 0 | -1.626684 | 2.004818  | 4.003733  |
| 41 | 6  | 0 | 4.318264  | -1.085543 | -2.073200 |
| 42 | 6  | 0 | 4.156221  | -2.200303 | -1.230112 |
| 43 | 6  | 0 | 2.844237  | -2.735515 | -1.411869 |
| 44 | 6  | 0 | 2.202694  | -1.922145 | -2.410884 |
| 45 | 6  | 0 | 3.112332  | -0.882869 | -2.815058 |
| 46 | 1  | 0 | 5.189497  | -0.443571 | -2.105159 |
| 47 | 1  | 0 | 4.882106  | -2.550895 | -0.508058 |
| 48 | 1  | 0 | 2.452639  | -3.637056 | -0.961587 |
| 49 | 1  | 0 | 1.215310  | -2.090054 | -2.822397 |
| 50 | 1  | 0 | 2.959167  | -0.156554 | -3.601379 |
| 51 | 42 | 0 | 2.361876  | -0.562302 | -0.617519 |
| 52 | 7  | 0 | 3.401644  | 1.216283  | 0.013003  |
| 53 | 7  | 0 | 3.172007  | -0.458648 | 1.388974  |
| 54 | 6  | 0 | 3.663232  | 2.522680  | -0.583367 |
| 55 | 6  | 0 | 5.155762  | 2.905418  | -0.605183 |
| 56 | 6  | 0 | 3.116123  | -1.211417 | 2.634473  |
| 57 | 6  | 0 | 3.838645  | -2.558192 | 2.487415  |
| 58 | 6  | 0 | 3.579472  | 0.806739  | 1.270439  |
| 59 | 6  | 0 | 4.123889  | 1.624390  | 2.423942  |
| 60 | 6  | 0 | 2.773741  | 3.642984  | -0.011941 |
| 61 | 6  | 0 | 1.658894  | -1.412292 | 3.079835  |
| 62 | 1  | 0 | 3.363015  | 2.394970  | -1.629658 |
| 63 | 1  | 0 | 5.307079  | 3.798557  | -1.223267 |
| 64 | 1  | 0 | 5.751972  | 2.090777  | -1.030610 |
| 65 | 1  | 0 | 5.551717  | 3.126023  | 0.392016  |
| 66 | 1  | 0 | 3.634352  | -0.643038 | 3.420191  |
| 67 | 1  | 0 | 3.809016  | -3.118876 | 3.429252  |
| 68 | 1  | 0 | 4.887803  | -2.410232 | 2.207653  |
| 69 | 1  | 0 | 3.358547  | -3.164125 | 1.711452  |
| 70 | 1  | 0 | 4.980645  | 1.119292  | 2.883657  |
| 71 | 1  | 0 | 3.358202  | 1.745002  | 3.198873  |
| 72 | 1  | 0 | 4.442343  | 2.614648  | 2.104547  |
| 73 | 1  | 0 | 2.889933  | 4.559627  | -0.603112 |
| 74 | 1  | 0 | 1.721692  | 3.341604  | -0.046249 |
| 75 | 1  | 0 | 3.023884  | 3.885769  | 1.026800  |
| 76 | 1  | 0 | 1.160470  | -0.447613 | 3.223412  |
| 77 | 1  | 0 | 1.104054  | -1.962152 | 2.311872  |
| 78 | 1  | 0 | 1.611005  | -1.973932 | 4.021194  |

-----  
Optimized Cartesian coordinates for **Cat-B**.  
-----

| Center<br>Number | Atomic<br>Number | Atomic<br>Type | Coordinates (Angstroms) |           |           |
|------------------|------------------|----------------|-------------------------|-----------|-----------|
|                  |                  |                | X                       | Y         | Z         |
| 1                | 6                | 0              | 0.087702                | -1.654026 | -2.270085 |
| 2                | 6                | 0              | 1.248535                | -0.856525 | -2.389602 |
| 3                | 6                | 0              | 2.236062                | -1.368710 | -1.497065 |
| 4                | 6                | 0              | 1.680798                | -2.508363 | -0.834031 |
| 5                | 6                | 0              | 0.340392                | -2.671799 | -1.302706 |
| 6                | 1                | 0              | -0.842968               | -1.500756 | -2.799033 |
| 7                | 1                | 0              | 1.356946                | 0.012010  | -3.024176 |
| 8                | 1                | 0              | 3.245290                | -0.997300 | -1.385876 |
| 9                | 1                | 0              | 2.199902                | -3.162426 | -0.147525 |
| 10               | 1                | 0              | -0.340830               | -3.462219 | -1.018993 |
| 11               | 42               | 0              | 0.495779                | -0.664809 | -0.027065 |
| 12               | 7                | 0              | -1.500602               | 0.227121  | -0.131654 |
| 13               | 7                | 0              | 0.244201                | 1.517381  | -0.264064 |
| 14               | 6                | 0              | -2.859929               | -0.292609 | -0.001643 |
| 15               | 6                | 0              | -3.721865               | -0.078425 | -1.260710 |
| 16               | 6                | 0              | 1.027889                | 2.748643  | -0.264349 |
| 17               | 6                | 0              | 2.351417                | 2.546953  | -1.010392 |
| 18               | 6                | 0              | -1.086906               | 1.487959  | -0.248369 |
| 19               | 6                | 0              | -1.954918               | 2.722749  | -0.354782 |
| 20               | 1                | 0              | -4.656701               | -0.643279 | -1.176514 |
| 21               | 1                | 0              | -3.192379               | -0.427180 | -2.152717 |
| 22               | 1                | 0              | -3.986311               | 0.971511  | -1.417684 |
| 23               | 1                | 0              | 2.925265                | 3.479154  | -1.031801 |
| 24               | 1                | 0              | 2.175477                | 2.230280  | -2.042807 |
| 25               | 1                | 0              | 2.961425                | 1.784586  | -0.516028 |
| 26               | 1                | 0              | -1.755648               | 3.250521  | -1.293714 |
| 27               | 1                | 0              | -1.740968               | 3.418068  | 0.462911  |
| 28               | 1                | 0              | -3.013828               | 2.477934  | -0.322781 |
| 29               | 6                | 0              | -3.571070               | 0.165703  | 1.285274  |
| 30               | 1                | 0              | -2.951125               | -0.053191 | 2.158687  |
| 31               | 1                | 0              | -3.788819               | 1.238166  | 1.281639  |
| 32               | 1                | 0              | -4.522638               | -0.364771 | 1.400813  |
| 33               | 1                | 0              | -2.724959               | -1.376314 | 0.092341  |
| 34               | 1                | 0              | 0.462019                | 3.517547  | -0.812196 |
| 35               | 6                | 0              | 1.275152                | 3.277306  | 1.160695  |
| 36               | 1                | 0              | 0.332547                | 3.432099  | 1.695039  |
| 37               | 1                | 0              | 1.874487                | 2.569251  | 1.738566  |
| 38               | 1                | 0              | 1.808868                | 4.234041  | 1.130096  |
| 39               | 6                | 0              | 1.798628                | -0.193915 | 1.384266  |
| 40               | 8                | 0              | 2.582094                | 0.054618  | 2.209696  |
| 41               | 6                | 0              | -0.273019               | -1.519506 | 1.576581  |

42            8            0            -0.739795    -2.038590    2.509276

---

Optimized Cartesian coordinates for **Int0**.

---

| Center<br>Number | Atomic<br>Number | Atomic<br>Type | Coordinates (Angstroms) |           |           |
|------------------|------------------|----------------|-------------------------|-----------|-----------|
|                  |                  |                | X                       | Y         | Z         |
| 1                | 6                | 0              | 0.078791                | 0.182572  | 2.537215  |
| 2                | 6                | 0              | 0.008170                | -1.236330 | 2.528204  |
| 3                | 6                | 0              | 1.258150                | -1.727220 | 2.075170  |
| 4                | 6                | 0              | 2.126054                | -0.608042 | 1.838234  |
| 5                | 6                | 0              | 1.390564                | 0.582398  | 2.140162  |
| 6                | 1                | 0              | -0.727070               | 0.850125  | 2.812352  |
| 7                | 1                | 0              | -0.858404               | -1.830409 | 2.785149  |
| 8                | 1                | 0              | 1.521526                | -2.771339 | 1.958847  |
| 9                | 1                | 0              | 3.174231                | -0.657192 | 1.577364  |
| 10               | 1                | 0              | 1.771134                | 1.593220  | 2.110667  |
| 11               | 42               | 0              | 0.466822                | -0.390298 | 0.223504  |
| 12               | 7                | 0              | -1.160402               | 0.925090  | -0.336503 |
| 13               | 7                | 0              | -1.228167               | -1.188731 | -0.836609 |
| 14               | 6                | 0              | -1.379801               | 2.369203  | -0.304880 |
| 15               | 6                | 0              | -2.610625               | 2.788552  | 0.519980  |
| 16               | 6                | 0              | -1.823946               | -2.479183 | -1.174254 |
| 17               | 6                | 0              | -1.363634               | -3.566980 | -0.197346 |
| 18               | 6                | 0              | -1.908248               | -0.027286 | -0.879706 |
| 19               | 6                | 0              | -3.315088               | 0.108289  | -1.417255 |
| 20               | 1                | 0              | -2.615772               | 3.875004  | 0.660090  |
| 21               | 1                | 0              | -2.590972               | 2.318521  | 1.508226  |
| 22               | 1                | 0              | -3.552893               | 2.515076  | 0.036291  |
| 23               | 1                | 0              | -1.797630               | -4.534752 | -0.469562 |
| 24               | 1                | 0              | -1.664922               | -3.329475 | 0.826626  |
| 25               | 1                | 0              | -0.272394               | -3.669457 | -0.214759 |
| 26               | 1                | 0              | -4.049699               | -0.258416 | -0.689699 |
| 27               | 1                | 0              | -3.437226               | -0.476239 | -2.333034 |
| 28               | 1                | 0              | -3.559880               | 1.144668  | -1.643087 |
| 29               | 6                | 0              | -1.359679               | 3.004598  | -1.706948 |
| 30               | 1                | 0              | -0.449406               | 2.716396  | -2.238284 |
| 31               | 1                | 0              | -2.220470               | 2.701605  | -2.311459 |
| 32               | 1                | 0              | -1.380338               | 4.096932  | -1.626063 |
| 33               | 1                | 0              | -0.504261               | 2.759978  | 0.225350  |
| 34               | 1                | 0              | -2.918896               | -2.412248 | -1.096663 |
| 35               | 6                | 0              | -1.471646               | -2.862987 | -2.622680 |
| 36               | 1                | 0              | -1.805995               | -2.095823 | -3.327690 |
| 37               | 1                | 0              | -0.386359               | -2.963446 | -2.732943 |



|    |   |   |           |           |           |
|----|---|---|-----------|-----------|-----------|
| 38 | 1 | 0 | -1.938191 | -3.814543 | -2.901587 |
| 39 | 6 | 0 | 2.336091  | 3.900791  | 0.443400  |
| 40 | 8 | 0 | 2.171333  | 4.641305  | -0.403504 |
| 41 | 6 | 0 | 1.434876  | 0.704119  | -1.050212 |
| 42 | 8 | 0 | 2.023902  | 1.405628  | -1.786267 |

-----  
Optimized Cartesian coordinates for **Int1**.

| Center<br>Number | Atomic<br>Number | Atomic<br>Type | Coordinates (Angstroms) |           |           |
|------------------|------------------|----------------|-------------------------|-----------|-----------|
|                  |                  |                | X                       | Y         | Z         |
| 1                | 6                | 0              | 0.238262                | -0.939109 | 2.563651  |
| 2                | 6                | 0              | -0.957359               | -1.552277 | 2.101065  |
| 3                | 6                | 0              | -0.612411               | -2.619283 | 1.215479  |
| 4                | 6                | 0              | 0.814894                | -2.633103 | 1.098163  |
| 5                | 6                | 0              | 1.329082                | -1.586678 | 1.932364  |
| 6                | 1                | 0              | 0.300485                | -0.104310 | 3.249151  |
| 7                | 1                | 0              | -1.959481               | -1.272851 | 2.396685  |
| 8                | 1                | 0              | -1.299942               | -3.323653 | 0.768759  |
| 9                | 1                | 0              | 1.402584                | -3.360797 | 0.555965  |
| 10               | 1                | 0              | 2.375536                | -1.350266 | 2.082075  |
| 11               | 42               | 0              | 0.047919                | -0.673711 | 0.091632  |
| 12               | 7                | 0              | 0.127731                | 1.434125  | -0.025001 |
| 13               | 7                | 0              | -1.763653               | 0.460800  | -0.465506 |
| 14               | 6                | 0              | 1.084595                | 2.413824  | 0.498362  |
| 15               | 6                | 0              | 0.587463                | 3.210539  | 1.717332  |
| 16               | 6                | 0              | -3.166870               | 0.269680  | -0.819469 |
| 17               | 6                | 0              | -4.060320               | 0.231718  | 0.433345  |
| 18               | 6                | 0              | -1.181034               | 1.637823  | -0.313854 |
| 19               | 6                | 0              | -1.879379               | 2.973342  | -0.426507 |
| 20               | 1                | 0              | 1.418156                | 3.766087  | 2.165850  |
| 21               | 1                | 0              | 0.179937                | 2.537330  | 2.478217  |
| 22               | 1                | 0              | -0.186964               | 3.937046  | 1.455816  |
| 23               | 1                | 0              | -5.115671               | 0.148905  | 0.151540  |
| 24               | 1                | 0              | -3.939249               | 1.135420  | 1.038871  |
| 25               | 1                | 0              | -3.808392               | -0.631888 | 1.056948  |
| 26               | 1                | 0              | -2.420439               | 3.219120  | 0.494557  |
| 27               | 1                | 0              | -2.610268               | 2.958597  | -1.239584 |
| 28               | 1                | 0              | -1.170505               | 3.775314  | -0.628270 |
| 29               | 6                | 0              | 1.649611                | 3.326062  | -0.606411 |
| 30               | 1                | 0              | 2.032686                | 2.724089  | -1.434459 |
| 31               | 1                | 0              | 0.895093                | 4.011897  | -1.004736 |
| 32               | 1                | 0              | 2.473283                | 3.931127  | -0.212040 |
| 33               | 1                | 0              | 1.929092                | 1.803961  | 0.844723  |

|    |   |   |           |           |           |
|----|---|---|-----------|-----------|-----------|
| 34 | 1 | 0 | -3.490711 | 1.124322  | -1.431460 |
| 35 | 6 | 0 | -3.354012 | -0.993065 | -1.665898 |
| 36 | 1 | 0 | -2.754169 | -0.950717 | -2.577339 |
| 37 | 1 | 0 | -3.051305 | -1.883593 | -1.106197 |
| 38 | 1 | 0 | -4.406908 | -1.104564 | -1.946002 |
| 39 | 6 | 0 | -0.091165 | -1.342495 | -1.731888 |
| 40 | 8 | 0 | -0.161013 | -1.744938 | -2.830638 |
| 41 | 7 | 0 | 4.155495  | -0.366753 | -0.964448 |
| 42 | 7 | 0 | 4.084928  | -1.481842 | -1.155772 |
| 43 | 8 | 0 | 4.230377  | 0.807326  | -0.757727 |

-----  
Optimized Cartesian coordinates for **TS1**.

| Center<br>Number | Atomic<br>Number | Atomic<br>Type | Coordinates (Angstroms) |           |           |
|------------------|------------------|----------------|-------------------------|-----------|-----------|
|                  |                  |                | X                       | Y         | Z         |
| 1                | 6                | 0              | -0.876947               | -1.159488 | -2.258310 |
| 2                | 6                | 0              | 0.501621                | -1.413482 | -2.027714 |
| 3                | 6                | 0              | 0.620339                | -2.488765 | -1.085358 |
| 4                | 6                | 0              | -0.699795               | -2.870420 | -0.712734 |
| 5                | 6                | 0              | -1.611259               | -2.042444 | -1.433275 |
| 6                | 1                | 0              | -1.287371               | -0.413384 | -2.924740 |
| 7                | 1                | 0              | 1.322748                | -0.899623 | -2.505315 |
| 8                | 1                | 0              | 1.536672                | -2.965175 | -0.768048 |
| 9                | 1                | 0              | -0.967533               | -3.661725 | -0.026486 |
| 10               | 1                | 0              | -2.689739               | -2.076415 | -1.344997 |
| 11               | 42               | 0              | -0.235656               | -0.660912 | 0.116917  |
| 12               | 7                | 0              | -0.255605               | 1.502543  | -0.032976 |
| 13               | 7                | 0              | 1.656823                | 0.480385  | 0.097003  |
| 14               | 6                | 0              | -1.316930               | 2.485755  | -0.213790 |
| 15               | 6                | 0              | -1.320280               | 3.150612  | -1.603108 |
| 16               | 6                | 0              | 3.106562                | 0.312873  | 0.195219  |
| 17               | 6                | 0              | 3.739944                | -0.026489 | -1.167244 |
| 18               | 6                | 0              | 1.063403                | 1.669397  | -0.037110 |
| 19               | 6                | 0              | 1.814566                | 2.977900  | -0.143463 |
| 20               | 1                | 0              | -2.228785               | 3.748070  | -1.736233 |
| 21               | 1                | 0              | -1.294167               | 2.389909  | -2.389328 |
| 22               | 1                | 0              | -0.464384               | 3.816106  | -1.751819 |
| 23               | 1                | 0              | 4.833239                | -0.026061 | -1.094147 |
| 24               | 1                | 0              | 3.450630                | 0.700217  | -1.933639 |
| 25               | 1                | 0              | 3.430640                | -1.020368 | -1.506099 |
| 26               | 1                | 0              | 2.595128                | 2.923232  | -0.908011 |
| 27               | 1                | 0              | 2.302462                | 3.215607  | 0.808754  |
| 28               | 1                | 0              | 1.150197                | 3.802062  | -0.393113 |

|    |   |   |           |           |           |
|----|---|---|-----------|-----------|-----------|
| 29 | 6 | 0 | -1.393409 | 3.509249  | 0.934525  |
| 30 | 1 | 0 | -1.405708 | 2.993367  | 1.898760  |
| 31 | 1 | 0 | -0.546563 | 4.202420  | 0.931738  |
| 32 | 1 | 0 | -2.308745 | 4.105467  | 0.850534  |
| 33 | 1 | 0 | -2.244059 | 1.900460  | -0.154966 |
| 34 | 1 | 0 | 3.536708  | 1.269147  | 0.524489  |
| 35 | 6 | 0 | 3.494552  | -0.732835 | 1.246375  |
| 36 | 1 | 0 | 3.121127  | -0.460181 | 2.235241  |
| 37 | 1 | 0 | 3.086156  | -1.716092 | 0.992391  |
| 38 | 1 | 0 | 4.584789  | -0.822529 | 1.299424  |
| 39 | 6 | 0 | 0.360494  | -1.015155 | 1.953607  |
| 40 | 8 | 0 | 0.719502  | -1.263415 | 3.035275  |
| 41 | 7 | 0 | -3.285757 | -0.250130 | 0.758616  |
| 42 | 7 | 0 | -4.368068 | -0.578816 | 0.584787  |
| 43 | 8 | 0 | -2.060144 | -0.667056 | 1.129575  |

-----  
Optimized Cartesian coordinates for **Int2**.

| Center<br>Number | Atomic<br>Number | Atomic<br>Type | Coordinates (Angstroms) |           |           |
|------------------|------------------|----------------|-------------------------|-----------|-----------|
|                  |                  |                | X                       | Y         | Z         |
| 1                | 6                | 0              | -0.829729               | -1.182843 | -2.217490 |
| 2                | 6                | 0              | 0.555331                | -1.380503 | -1.944243 |
| 3                | 6                | 0              | 0.678868                | -2.505082 | -1.084059 |
| 4                | 6                | 0              | -0.635782               | -3.020278 | -0.862144 |
| 5                | 6                | 0              | -1.552928               | -2.216822 | -1.575092 |
| 6                | 1                | 0              | -1.247712               | -0.400336 | -2.836830 |
| 7                | 1                | 0              | 1.365422                | -0.765889 | -2.306318 |
| 8                | 1                | 0              | 1.600404                | -2.936884 | -0.719637 |
| 9                | 1                | 0              | -0.885716               | -3.863792 | -0.232139 |
| 10               | 1                | 0              | -2.630011               | -2.308347 | -1.538602 |
| 11               | 42               | 0              | -0.341096               | -0.737383 | 0.233531  |
| 12               | 7                | 0              | -0.132369               | 1.350070  | -0.095856 |
| 13               | 7                | 0              | 1.849478                | 0.427337  | 0.228585  |
| 14               | 6                | 0              | -1.197193               | 2.306095  | -0.420106 |
| 15               | 6                | 0              | -1.036079               | 3.004787  | -1.782566 |
| 16               | 6                | 0              | 3.306897                | 0.330116  | 0.286465  |
| 17               | 6                | 0              | 3.924480                | 0.152686  | -1.114023 |
| 18               | 6                | 0              | 1.194551                | 1.545626  | -0.050923 |
| 19               | 6                | 0              | 1.866551                | 2.875634  | -0.320875 |
| 20               | 1                | 0              | -1.965024               | 3.522235  | -2.044805 |
| 21               | 1                | 0              | -0.823487               | 2.273453  | -2.568678 |
| 22               | 1                | 0              | -0.236180               | 3.750004  | -1.785891 |
| 23               | 1                | 0              | 5.018671                | 0.147823  | -1.055888 |

|    |   |   |           |           |           |
|----|---|---|-----------|-----------|-----------|
| 24 | 1 | 0 | 3.627823  | 0.959074  | -1.792107 |
| 25 | 1 | 0 | 3.607992  | -0.797428 | -1.556694 |
| 26 | 1 | 0 | 2.147440  | 2.961919  | -1.375866 |
| 27 | 1 | 0 | 2.779136  | 2.971040  | 0.271108  |
| 28 | 1 | 0 | 1.214438  | 3.712601  | -0.076355 |
| 29 | 6 | 0 | -1.467355 | 3.297425  | 0.726034  |
| 30 | 1 | 0 | -1.624132 | 2.756532  | 1.663399  |
| 31 | 1 | 0 | -0.641027 | 4.000006  | 0.874461  |
| 32 | 1 | 0 | -2.366736 | 3.885421  | 0.513044  |
| 33 | 1 | 0 | -2.094400 | 1.683529  | -0.500663 |
| 34 | 1 | 0 | 3.724218  | 1.253779  | 0.717589  |
| 35 | 6 | 0 | 3.735813  | -0.821948 | 1.203539  |
| 36 | 1 | 0 | 3.396473  | -0.666142 | 2.229389  |
| 37 | 1 | 0 | 3.323516  | -1.772933 | 0.849430  |
| 38 | 1 | 0 | 4.827026  | -0.909489 | 1.213874  |
| 39 | 6 | 0 | 0.541015  | -0.618020 | 2.071462  |
| 40 | 8 | 0 | 0.977191  | -0.572099 | 3.138710  |
| 41 | 7 | 0 | -4.641304 | 0.405281  | 0.289402  |
| 42 | 7 | 0 | -5.049132 | -0.246465 | 1.082868  |
| 43 | 8 | 0 | -1.799101 | -1.014480 | 1.100855  |

-----  
Optimized Cartesian coordinates for **TS2**.

| Center<br>Number | Atomic<br>Number | Atomic<br>Type | Coordinates (Angstroms) |           |           |
|------------------|------------------|----------------|-------------------------|-----------|-----------|
|                  |                  |                | X                       | Y         | Z         |
| 1                | 6                | 0              | -1.317049               | -1.042947 | -2.043674 |
| 2                | 6                | 0              | 0.009401                | -0.655847 | -2.450670 |
| 3                | 6                | 0              | 0.909018                | -1.646633 | -2.039200 |
| 4                | 6                | 0              | 0.182531                | -2.679950 | -1.366492 |
| 5                | 6                | 0              | -1.194979               | -2.324991 | -1.425181 |
| 6                | 1                | 0              | -2.236998               | -0.532683 | -2.292381 |
| 7                | 1                | 0              | 0.271100                | 0.277850  | -2.929408 |
| 8                | 1                | 0              | 1.983468                | -1.605609 | -2.143399 |
| 9                | 1                | 0              | 0.595193                | -3.596176 | -0.968487 |
| 10               | 1                | 0              | -2.010152               | -2.896840 | -1.004468 |
| 11               | 42               | 0              | -0.294195               | -0.715903 | 0.035424  |
| 12               | 7                | 0              | -0.206494               | 1.390913  | 0.006574  |
| 13               | 7                | 0              | 1.728263                | 0.391422  | 0.230302  |
| 14               | 6                | 0              | -1.254601               | 2.387855  | -0.213939 |
| 15               | 6                | 0              | -0.967696               | 3.380600  | -1.355140 |
| 16               | 6                | 0              | 3.171223                | 0.233016  | 0.403778  |
| 17               | 6                | 0              | 3.945297                | 0.532885  | -0.894890 |
| 18               | 6                | 0              | 1.117636                | 1.563480  | 0.167479  |

|    |   |   |           |           |           |
|----|---|---|-----------|-----------|-----------|
| 19 | 6 | 0 | 1.806627  | 2.907082  | 0.260383  |
| 20 | 1 | 0 | -1.876528 | 3.942869  | -1.594721 |
| 21 | 1 | 0 | -0.650954 | 2.851360  | -2.259478 |
| 22 | 1 | 0 | -0.194413 | 4.108975  | -1.095521 |
| 23 | 1 | 0 | 5.025010  | 0.449158  | -0.728028 |
| 24 | 1 | 0 | 3.739772  | 1.541021  | -1.265735 |
| 25 | 1 | 0 | 3.670000  | -0.175487 | -1.682640 |
| 26 | 1 | 0 | 2.060082  | 3.283406  | -0.736094 |
| 27 | 1 | 0 | 2.733669  | 2.830161  | 0.831916  |
| 28 | 1 | 0 | 1.164371  | 3.643563  | 0.743816  |
| 29 | 6 | 0 | -1.666148 | 3.098246  | 1.088478  |
| 30 | 1 | 0 | -1.901704 | 2.361356  | 1.861328  |
| 31 | 1 | 0 | -0.873819 | 3.750416  | 1.471286  |
| 32 | 1 | 0 | -2.553194 | 3.719205  | 0.921175  |
| 33 | 1 | 0 | -2.118774 | 1.792396  | -0.528901 |
| 34 | 1 | 0 | 3.527568  | 0.940634  | 1.170006  |
| 35 | 6 | 0 | 3.507873  | -1.175472 | 0.905705  |
| 36 | 1 | 0 | 3.049505  | -1.376382 | 1.876136  |
| 37 | 1 | 0 | 3.152782  | -1.935487 | 0.203217  |
| 38 | 1 | 0 | 4.591718  | -1.287768 | 1.013217  |
| 39 | 6 | 0 | 0.594021  | -0.974025 | 2.569831  |
| 40 | 8 | 0 | 0.600954  | -1.475865 | 3.595057  |
| 41 | 7 | 0 | -4.496817 | -0.066854 | 0.022751  |
| 42 | 7 | 0 | -4.759111 | -0.523880 | 0.993896  |
| 43 | 8 | 0 | -1.517981 | -1.223078 | 1.128793  |

-----  
Optimized Cartesian coordinates for **Int3**.

| Center<br>Number | Atomic<br>Number | Atomic<br>Type | Coordinates (Angstroms) |           |           |
|------------------|------------------|----------------|-------------------------|-----------|-----------|
|                  |                  |                | X                       | Y         | Z         |
| 1                | 6                | 0              | 0.177145                | -2.122273 | -2.114138 |
| 2                | 6                | 0              | -0.824424               | -1.313638 | -2.647350 |
| 3                | 6                | 0              | -0.263622               | -0.033557 | -2.984433 |
| 4                | 6                | 0              | 1.143142                | -0.111456 | -2.701085 |
| 5                | 6                | 0              | 1.411718                | -1.384156 | -2.089660 |
| 6                | 1                | 0              | 0.036338                | -3.112159 | -1.700355 |
| 7                | 1                | 0              | -1.873071               | -1.569989 | -2.715385 |
| 8                | 1                | 0              | -0.767853               | 0.765817  | -3.508434 |
| 9                | 1                | 0              | 1.876604                | 0.655251  | -2.917839 |
| 10               | 1                | 0              | 2.383141                | -1.773997 | -1.819939 |
| 11               | 42               | 0              | 0.224026                | 0.074272  | -0.673249 |
| 12               | 7                | 0              | -0.140186               | -1.267038 | 0.935146  |
| 13               | 7                | 0              | -1.746200               | 0.000583  | 0.170427  |

|    |   |   |           |           |           |
|----|---|---|-----------|-----------|-----------|
| 14 | 6 | 0 | 0.710984  | -2.118917 | 1.766479  |
| 15 | 6 | 0 | 0.116723  | -3.518277 | 2.007167  |
| 16 | 6 | 0 | -2.956308 | 0.818925  | 0.161968  |
| 17 | 6 | 0 | -3.594562 | 0.803969  | -1.231303 |
| 18 | 6 | 0 | -1.358271 | -0.777496 | 1.185275  |
| 19 | 6 | 0 | -2.197210 | -1.016641 | 2.420234  |
| 20 | 1 | 0 | 0.865885  | -4.168004 | 2.471948  |
| 21 | 1 | 0 | -0.188100 | -3.972537 | 1.059518  |
| 22 | 1 | 0 | -0.755258 | -3.499972 | 2.667749  |
| 23 | 1 | 0 | -4.517060 | 1.393843  | -1.237188 |
| 24 | 1 | 0 | -3.837100 | -0.218074 | -1.537637 |
| 25 | 1 | 0 | -2.909972 | 1.230303  | -1.970786 |
| 26 | 1 | 0 | -3.157073 | -1.463565 | 2.141970  |
| 27 | 1 | 0 | -2.408624 | -0.067238 | 2.921600  |
| 28 | 1 | 0 | -1.702629 | -1.676075 | 3.128980  |
| 29 | 6 | 0 | 1.173280  | -1.431963 | 3.063484  |
| 30 | 1 | 0 | 1.602557  | -0.451657 | 2.837511  |
| 31 | 1 | 0 | 0.352702  | -1.287677 | 3.773399  |
| 32 | 1 | 0 | 1.938454  | -2.037529 | 3.561289  |
| 33 | 1 | 0 | 1.607762  | -2.263878 | 1.154641  |
| 34 | 1 | 0 | -3.680366 | 0.375579  | 0.860610  |
| 35 | 6 | 0 | -2.660642 | 2.253807  | 0.627625  |
| 36 | 1 | 0 | -2.249213 | 2.264152  | 1.642051  |
| 37 | 1 | 0 | -1.924545 | 2.722111  | -0.032994 |
| 38 | 1 | 0 | -3.572709 | 2.860787  | 0.621206  |
| 39 | 6 | 0 | 0.848220  | 4.311988  | 0.911798  |
| 40 | 8 | 0 | 0.815312  | 4.029426  | 2.013914  |
| 41 | 7 | 0 | 4.341113  | 0.216225  | 0.080573  |
| 42 | 7 | 0 | 4.479036  | 1.298851  | 0.253304  |
| 43 | 8 | 0 | 0.961613  | 1.430266  | 0.060528  |

-----  
Optimized Cartesian coordinates for **Int4**.

| Center<br>Number | Atomic<br>Number | Atomic<br>Type | Coordinates (Angstroms) |           |          |
|------------------|------------------|----------------|-------------------------|-----------|----------|
|                  |                  |                | X                       | Y         | Z        |
| 1                | 6                | 0              | -0.377452               | 0.050378  | 2.832879 |
| 2                | 6                | 0              | -0.359211               | -1.320626 | 2.585067 |
| 3                | 6                | 0              | 0.919095                | -1.679628 | 2.033100 |
| 4                | 6                | 0              | 1.713811                | -0.482440 | 2.017504 |
| 5                | 6                | 0              | 0.888427                | 0.613244  | 2.445411 |
| 6                | 1                | 0              | -1.232335               | 0.618920  | 3.174823 |
| 7                | 1                | 0              | -1.197906               | -1.994192 | 2.699037 |
| 8                | 1                | 0              | 1.267642                | -2.682788 | 1.832890 |

|    |    |   |           |           |           |
|----|----|---|-----------|-----------|-----------|
| 9  | 1  | 0 | 2.758120  | -0.416997 | 1.738746  |
| 10 | 1  | 0 | 1.210383  | 1.632330  | 2.607094  |
| 11 | 42 | 0 | 0.308938  | -0.183956 | 0.304978  |
| 12 | 7  | 0 | -1.428574 | 0.998394  | -0.021844 |
| 13 | 7  | 0 | -1.449460 | -1.140350 | -0.465488 |
| 14 | 6  | 0 | -1.715275 | 2.432670  | 0.024038  |
| 15 | 6  | 0 | -3.054331 | 2.762977  | 0.707817  |
| 16 | 6  | 0 | -1.787980 | -2.395527 | -1.131632 |
| 17 | 6  | 0 | -1.649597 | -3.567062 | -0.153075 |
| 18 | 6  | 0 | -2.081598 | 0.020881  | -0.657946 |
| 19 | 6  | 0 | -3.330424 | 0.160284  | -1.498624 |
| 20 | 1  | 0 | -3.129412 | 3.841790  | 0.880912  |
| 21 | 1  | 0 | -3.125239 | 2.256583  | 1.675188  |
| 22 | 1  | 0 | -3.920707 | 2.467498  | 0.108473  |
| 23 | 1  | 0 | -1.931019 | -4.507522 | -0.638089 |
| 24 | 1  | 0 | -2.293151 | -3.423043 | 0.720106  |
| 25 | 1  | 0 | -0.615792 | -3.656265 | 0.193899  |
| 26 | 1  | 0 | -4.131784 | -0.462686 | -1.088243 |
| 27 | 1  | 0 | -3.137004 | -0.182420 | -2.519667 |
| 28 | 1  | 0 | -3.680842 | 1.188262  | -1.542129 |
| 29 | 6  | 0 | -1.549948 | 3.127945  | -1.338656 |
| 30 | 1  | 0 | -0.573696 | 2.887493  | -1.768498 |
| 31 | 1  | 0 | -2.320936 | 2.827377  | -2.055271 |
| 32 | 1  | 0 | -1.615691 | 4.215007  | -1.219785 |
| 33 | 1  | 0 | -0.929405 | 2.831924  | 0.674447  |
| 34 | 1  | 0 | -2.841160 | -2.350509 | -1.444057 |
| 35 | 6  | 0 | -0.925642 | -2.608265 | -2.386311 |
| 36 | 1  | 0 | -1.064885 | -1.794799 | -3.105594 |
| 37 | 1  | 0 | 0.134838  | -2.632429 | -2.117240 |
| 38 | 1  | 0 | -1.183714 | -3.551585 | -2.880264 |
| 39 | 6  | 0 | 2.804032  | 2.800351  | -0.595810 |
| 40 | 8  | 0 | 2.461772  | 3.226176  | -1.593854 |
| 41 | 8  | 0 | 1.285343  | 0.093312  | -1.069435 |

-----  
Optimized Cartesian coordinates for **TS3**.  
-----

| Center<br>Number | Atomic<br>Number | Atomic<br>Type | Coordinates (Angstroms) |           |          |
|------------------|------------------|----------------|-------------------------|-----------|----------|
|                  |                  |                | X                       | Y         | Z        |
| 1                | 6                | 0              | 0.425650                | -1.560850 | 2.140223 |
| 2                | 6                | 0              | -0.952651               | -1.623268 | 1.916329 |
| 3                | 6                | 0              | -1.193076               | -2.456003 | 0.772315 |
| 4                | 6                | 0              | 0.077565                | -2.941297 | 0.327825 |
| 5                | 6                | 0              | 1.087071                | -2.342095 | 1.151867 |

|    |    |   |           |           |           |
|----|----|---|-----------|-----------|-----------|
| 6  | 1  | 0 | 0.916075  | -0.953613 | 2.889670  |
| 7  | 1  | 0 | -1.706173 | -1.065471 | 2.453223  |
| 8  | 1  | 0 | -2.159419 | -2.769655 | 0.402938  |
| 9  | 1  | 0 | 0.241315  | -3.668905 | -0.455583 |
| 10 | 1  | 0 | 2.150718  | -2.522142 | 1.085822  |
| 11 | 42 | 0 | -0.021264 | -0.768525 | -0.407137 |
| 12 | 7  | 0 | 0.780906  | 1.035677  | 0.361913  |
| 13 | 7  | 0 | -1.389365 | 0.803723  | 0.180123  |
| 14 | 6  | 0 | 2.129570  | 1.581707  | 0.530114  |
| 15 | 6  | 0 | 2.386420  | 2.149990  | 1.937652  |
| 16 | 6  | 0 | -2.760056 | 1.195377  | -0.147446 |
| 17 | 6  | 0 | -3.748868 | 0.119232  | 0.310687  |
| 18 | 6  | 0 | -0.397194 | 1.671947  | 0.378505  |
| 19 | 6  | 0 | -0.614173 | 3.156097  | 0.562623  |
| 20 | 1  | 0 | 3.452174  | 2.369694  | 2.061998  |
| 21 | 1  | 0 | 2.096870  | 1.423690  | 2.702879  |
| 22 | 1  | 0 | 1.837814  | 3.077218  | 2.129186  |
| 23 | 1  | 0 | -4.775934 | 0.433865  | 0.099816  |
| 24 | 1  | 0 | -3.662240 | -0.067432 | 1.384856  |
| 25 | 1  | 0 | -3.565656 | -0.820556 | -0.218815 |
| 26 | 1  | 0 | 0.290468  | 3.663526  | 0.888038  |
| 27 | 1  | 0 | -1.397654 | 3.334236  | 1.304881  |
| 28 | 1  | 0 | -0.941925 | 3.609247  | -0.378542 |
| 29 | 6  | 0 | 2.536396  | 2.554686  | -0.590450 |
| 30 | 1  | 0 | 2.359729  | 2.099472  | -1.568939 |
| 31 | 1  | 0 | 1.980256  | 3.496204  | -0.547313 |
| 32 | 1  | 0 | 3.601971  | 2.796114  | -0.511902 |
| 33 | 1  | 0 | 2.779516  | 0.706502  | 0.431387  |
| 34 | 1  | 0 | -2.995949 | 2.114538  | 0.409766  |
| 35 | 6  | 0 | -2.926075 | 1.490157  | -1.648690 |
| 36 | 1  | 0 | -2.262554 | 2.297994  | -1.972636 |
| 37 | 1  | 0 | -2.677081 | 0.605587  | -2.240736 |
| 38 | 1  | 0 | -3.957451 | 1.787244  | -1.869406 |
| 39 | 6  | 0 | 2.206143  | -1.488832 | -1.507222 |
| 40 | 8  | 0 | 3.174510  | -1.041902 | -1.924548 |
| 41 | 8  | 0 | -0.167914 | -0.402948 | -2.076593 |

-----  
Optimized Cartesian coordinates for **Int5**.

| Center<br>Number | Atomic<br>Number | Atomic<br>Type | Coordinates (Angstroms) |           |           |
|------------------|------------------|----------------|-------------------------|-----------|-----------|
|                  |                  |                | X                       | Y         | Z         |
| 1                | 6                | 0              | 0.751210                | -0.999949 | -1.808368 |
| 2                | 6                | 0              | 0.916467                | 0.359824  | -2.112757 |



|    |    |   |           |           |           |
|----|----|---|-----------|-----------|-----------|
| 3  | 6  | 0 | 2.199062  | 0.780592  | -1.624437 |
| 4  | 6  | 0 | 2.825385  | -0.357975 | -1.040351 |
| 5  | 6  | 0 | 1.907229  | -1.459592 | -1.137058 |
| 6  | 1  | 0 | -0.140322 | -1.583178 | -1.995668 |
| 7  | 1  | 0 | 0.184811  | 1.000228  | -2.579141 |
| 8  | 1  | 0 | 2.656035  | 1.748772  | -1.778571 |
| 9  | 1  | 0 | 3.838389  | -0.404103 | -0.663679 |
| 10 | 1  | 0 | 2.089536  | -2.467909 | -0.791001 |
| 11 | 42 | 0 | 1.151829  | 0.463960  | 0.472756  |
| 12 | 7  | 0 | -0.843682 | -0.066096 | 0.762416  |
| 13 | 7  | 0 | -0.581474 | 1.948849  | -0.123503 |
| 14 | 6  | 0 | -1.443284 | -1.216553 | 1.448842  |
| 15 | 6  | 0 | -2.522085 | -1.937618 | 0.618987  |
| 16 | 6  | 0 | -0.862106 | 3.361344  | -0.349457 |
| 17 | 6  | 0 | -0.250992 | 3.817542  | -1.680544 |
| 18 | 6  | 0 | -1.429532 | 1.120016  | 0.444062  |
| 19 | 6  | 0 | -2.873509 | 1.467336  | 0.744618  |
| 20 | 1  | 0 | -2.785528 | -2.887594 | 1.096571  |
| 21 | 1  | 0 | -2.148729 | -2.154482 | -0.386389 |
| 22 | 1  | 0 | -3.444209 | -1.358327 | 0.516725  |
| 23 | 1  | 0 | -0.455239 | 4.879224  | -1.854486 |
| 24 | 1  | 0 | -0.664056 | 3.251161  | -2.521273 |
| 25 | 1  | 0 | 0.835311  | 3.679631  | -1.673343 |
| 26 | 1  | 0 | -3.341991 | 1.931624  | -0.127502 |
| 27 | 1  | 0 | -2.922828 | 2.187899  | 1.567889  |
| 28 | 1  | 0 | -3.461306 | 0.596783  | 1.022447  |
| 29 | 6  | 0 | -1.899959 | -0.907605 | 2.886335  |
| 30 | 1  | 0 | -1.094110 | -0.416036 | 3.439248  |
| 31 | 1  | 0 | -2.778303 | -0.256365 | 2.917875  |
| 32 | 1  | 0 | -2.158662 | -1.835726 | 3.407868  |
| 33 | 1  | 0 | -0.613789 | -1.924983 | 1.538413  |
| 34 | 1  | 0 | -1.948306 | 3.525316  | -0.416683 |
| 35 | 6  | 0 | -0.329146 | 4.213011  | 0.816783  |
| 36 | 1  | 0 | -0.797904 | 3.924200  | 1.762185  |
| 37 | 1  | 0 | 0.748968  | 4.069321  | 0.930405  |
| 38 | 1  | 0 | -0.528096 | 5.276534  | 0.642200  |
| 39 | 6  | 0 | 2.122848  | -0.973849 | 1.578300  |
| 40 | 8  | 0 | 2.608990  | -1.772939 | 2.253494  |
| 41 | 8  | 0 | 1.392617  | 1.476480  | 1.844730  |

-----  
Optimized Cartesian coordinates for **TS4**.  
-----

| Center<br>Number | Atomic<br>Number | Atomic<br>Type | Coordinates (Angstroms) |   |   |
|------------------|------------------|----------------|-------------------------|---|---|
|                  |                  |                | X                       | Y | Z |

---

|    |    |   |           |           |           |
|----|----|---|-----------|-----------|-----------|
| 1  | 6  | 0 | 0.804038  | -1.431513 | -1.864954 |
| 2  | 6  | 0 | 1.967171  | -0.625079 | -1.813645 |
| 3  | 6  | 0 | 2.815442  | -1.134559 | -0.802175 |
| 4  | 6  | 0 | 2.173550  | -2.265647 | -0.230002 |
| 5  | 6  | 0 | 0.917339  | -2.466663 | -0.878887 |
| 6  | 1  | 0 | -0.034150 | -1.287535 | -2.531424 |
| 7  | 1  | 0 | 2.155794  | 0.244604  | -2.426634 |
| 8  | 1  | 0 | 3.761975  | -0.717079 | -0.487276 |
| 9  | 1  | 0 | 2.554984  | -2.850205 | 0.595986  |
| 10 | 1  | 0 | 0.241753  | -3.297606 | -0.734517 |
| 11 | 42 | 0 | 0.631165  | -0.484743 | 0.357664  |
| 12 | 7  | 0 | -1.421019 | -0.145521 | -0.337596 |
| 13 | 7  | 0 | -0.020958 | 1.490662  | -0.091422 |
| 14 | 6  | 0 | -2.642689 | -0.951151 | -0.327456 |
| 15 | 6  | 0 | -3.305542 | -1.072328 | -1.712410 |
| 16 | 6  | 0 | 0.569834  | 2.824861  | -0.169218 |
| 17 | 6  | 0 | 1.564565  | 2.955089  | -1.332645 |
| 18 | 6  | 0 | -1.274167 | 1.166197  | -0.443637 |
| 19 | 6  | 0 | -2.305836 | 2.171259  | -0.898242 |
| 20 | 1  | 0 | -4.108631 | -1.816225 | -1.678056 |
| 21 | 1  | 0 | -2.579230 | -1.393545 | -2.465138 |
| 22 | 1  | 0 | -3.746598 | -0.129905 | -2.051378 |
| 23 | 1  | 0 | 1.938788  | 3.981952  | -1.403600 |
| 24 | 1  | 0 | 1.094122  | 2.696031  | -2.286922 |
| 25 | 1  | 0 | 2.421881  | 2.292674  | -1.179391 |
| 26 | 1  | 0 | -1.960144 | 2.694382  | -1.795802 |
| 27 | 1  | 0 | -2.471873 | 2.923789  | -0.120703 |
| 28 | 1  | 0 | -3.257007 | 1.695347  | -1.124626 |
| 29 | 6  | 0 | -3.634942 | -0.524931 | 0.768415  |
| 30 | 1  | 0 | -3.134602 | -0.489251 | 1.739570  |
| 31 | 1  | 0 | -4.073205 | 0.458355  | 0.568567  |
| 32 | 1  | 0 | -4.457737 | -1.245231 | 0.831691  |
| 33 | 1  | 0 | -2.293536 | -1.954794 | -0.060810 |
| 34 | 1  | 0 | -0.240451 | 3.546255  | -0.341309 |
| 35 | 6  | 0 | 1.231489  | 3.173748  | 1.170878  |
| 36 | 1  | 0 | 0.501024  | 3.139846  | 1.984237  |
| 37 | 1  | 0 | 2.024749  | 2.455989  | 1.404021  |
| 38 | 1  | 0 | 1.670182  | 4.176720  | 1.137581  |
| 39 | 6  | 0 | -0.243841 | -0.672167 | 2.147489  |
| 40 | 8  | 0 | -0.805540 | -0.737596 | 3.179425  |
| 41 | 8  | 0 | 1.440014  | -0.676445 | 2.019951  |

---

Optimized Cartesian coordinates for **Int6**.

| Center<br>Number | Atomic<br>Number | Atomic<br>Type | Coordinates (Angstroms) |           |           |
|------------------|------------------|----------------|-------------------------|-----------|-----------|
|                  |                  |                | X                       | Y         | Z         |
| 1                | 6                | 0              | 0.840628                | -1.586225 | -1.896839 |
| 2                | 6                | 0              | 1.067753                | -0.385565 | -2.598983 |
| 3                | 6                | 0              | 2.284955                | 0.196428  | -2.121775 |
| 4                | 6                | 0              | 2.800422                | -0.678813 | -1.100171 |
| 5                | 6                | 0              | 1.885093                | -1.774156 | -0.948209 |
| 6                | 1                | 0              | -0.035321               | -2.212347 | -1.997412 |
| 7                | 1                | 0              | 0.407477                | 0.052134  | -3.334760 |
| 8                | 1                | 0              | 2.758220                | 1.086889  | -2.511516 |
| 9                | 1                | 0              | 3.730222                | -0.562666 | -0.559856 |
| 10               | 1                | 0              | 2.000012                | -2.606649 | -0.269592 |
| 11               | 42               | 0              | 0.937660                | 0.274789  | -0.264952 |
| 12               | 7                | 0              | -1.008309               | -0.329915 | 0.113169  |
| 13               | 7                | 0              | -0.699307               | 1.702705  | -0.647117 |
| 14               | 6                | 0              | -1.558694               | -1.513105 | 0.780496  |
| 15               | 6                | 0              | -2.740834               | -2.143779 | 0.022078  |
| 16               | 6                | 0              | -0.935533               | 3.111739  | -0.935940 |
| 17               | 6                | 0              | -0.271502               | 3.477242  | -2.268999 |
| 18               | 6                | 0              | -1.574274               | 0.884175  | -0.092073 |
| 19               | 6                | 0              | -2.982003               | 1.278521  | 0.292905  |
| 20               | 1                | 0              | -2.982299               | -3.120543 | 0.454269  |
| 21               | 1                | 0              | -2.489997               | -2.290843 | -1.033122 |
| 22               | 1                | 0              | -3.647629               | -1.533613 | 0.068036  |
| 23               | 1                | 0              | -0.445391               | 4.530058  | -2.514016 |
| 24               | 1                | 0              | -0.667064               | 2.862940  | -3.083874 |
| 25               | 1                | 0              | 0.809834                | 3.313376  | -2.211056 |
| 26               | 1                | 0              | -3.523822               | 1.637047  | -0.588077 |
| 27               | 1                | 0              | -2.957807               | 2.095450  | 1.020474  |
| 28               | 1                | 0              | -3.539343               | 0.450957  | 0.723526  |
| 29               | 6                | 0              | -1.856175               | -1.289170 | 2.273617  |
| 30               | 1                | 0              | -0.977445               | -0.878113 | 2.777776  |
| 31               | 1                | 0              | -2.694602               | -0.604826 | 2.435125  |
| 32               | 1                | 0              | -2.110548               | -2.241574 | 2.751075  |
| 33               | 1                | 0              | -0.737144               | -2.236061 | 0.737552  |
| 34               | 1                | 0              | -2.017218               | 3.280670  | -1.045506 |
| 35               | 6                | 0              | -0.423497               | 4.007510  | 0.204238  |
| 36               | 1                | 0              | -0.920817               | 3.770839  | 1.149473  |
| 37               | 1                | 0              | 0.649570                | 3.857220  | 0.352814  |
| 38               | 1                | 0              | -0.602743               | 5.063763  | -0.025620 |
| 39               | 6                | 0              | 1.834488                | 0.133690  | 1.569761  |
| 40               | 8                | 0              | 2.533736                | -0.380726 | 2.408543  |

41            8            0            1.212442    1.296407    1.474466

---

Optimized Cartesian coordinates for **Int7**.

---

| Center<br>Number | Atomic<br>Number | Atomic<br>Type | Coordinates (Angstroms) |           |           |
|------------------|------------------|----------------|-------------------------|-----------|-----------|
|                  |                  |                | X                       | Y         | Z         |
| 1                | 6                | 0              | 0.592885                | -1.311616 | -2.170220 |
| 2                | 6                | 0              | 0.847994                | -0.133735 | -2.902263 |
| 3                | 6                | 0              | 2.057260                | 0.453616  | -2.409199 |
| 4                | 6                | 0              | 2.534653                | -0.394917 | -1.347600 |
| 5                | 6                | 0              | 1.608726                | -1.479893 | -1.188986 |
| 6                | 1                | 0              | -0.286172               | -1.933099 | -2.274802 |
| 7                | 1                | 0              | 0.212849                | 0.284510  | -3.670765 |
| 8                | 1                | 0              | 2.550032                | 1.326856  | -2.813356 |
| 9                | 1                | 0              | 3.448214                | -0.266762 | -0.782631 |
| 10               | 1                | 0              | 1.694264                | -2.278851 | -0.467142 |
| 11               | 42               | 0              | 0.657468                | 0.605449  | -0.602107 |
| 12               | 7                | 0              | -1.316395               | 0.053754  | -0.303260 |
| 13               | 7                | 0              | -0.924695               | 2.059621  | -1.092918 |
| 14               | 6                | 0              | -1.925213               | -1.097656 | 0.368664  |
| 15               | 6                | 0              | -3.202657               | -1.607770 | -0.321902 |
| 16               | 6                | 0              | -1.107018               | 3.459262  | -1.458280 |
| 17               | 6                | 0              | -0.260722               | 3.776009  | -2.696996 |
| 18               | 6                | 0              | -1.846184               | 1.273767  | -0.568305 |
| 19               | 6                | 0              | -3.277473               | 1.674030  | -0.290972 |
| 20               | 1                | 0              | -3.477935               | -2.585922 | 0.086044  |
| 21               | 1                | 0              | -3.043232               | -1.721821 | -1.398960 |
| 22               | 1                | 0              | -4.056970               | -0.941549 | -0.173217 |
| 23               | 1                | 0              | -0.396378               | 4.818823  | -3.001188 |
| 24               | 1                | 0              | -0.540398               | 3.132405  | -3.536759 |
| 25               | 1                | 0              | 0.801267                | 3.616604  | -2.482297 |
| 26               | 1                | 0              | -3.920437               | 1.380703  | -1.128212 |
| 27               | 1                | 0              | -3.362669               | 2.753122  | -0.158888 |
| 28               | 1                | 0              | -3.655735               | 1.187981  | 0.607880  |
| 29               | 6                | 0              | -2.112956               | -0.885171 | 1.881312  |
| 30               | 1                | 0              | -1.170069               | -0.581015 | 2.343429  |
| 31               | 1                | 0              | -2.864161               | -0.120627 | 2.104238  |
| 32               | 1                | 0              | -2.441210               | -1.817736 | 2.353217  |
| 33               | 1                | 0              | -1.173699               | -1.887280 | 0.260233  |
| 34               | 1                | 0              | -2.160161               | 3.627053  | -1.728558 |
| 35               | 6                | 0              | -0.748745               | 4.389498  | -0.287540 |
| 36               | 1                | 0              | -1.379827               | 4.190447  | 0.584095  |
| 37               | 1                | 0              | 0.289681                | 4.231286  | 0.017235  |

|    |   |   |           |           |           |
|----|---|---|-----------|-----------|-----------|
| 38 | 1 | 0 | -0.876667 | 5.439466  | -0.573648 |
| 39 | 6 | 0 | 1.456229  | 0.486431  | 1.275339  |
| 40 | 8 | 0 | 2.087575  | -0.024542 | 2.172307  |
| 41 | 8 | 0 | 0.883194  | 1.666982  | 1.120382  |
| 42 | 6 | 0 | 2.293351  | -2.994195 | 2.095663  |
| 43 | 8 | 0 | 2.571038  | -3.110327 | 3.192189  |

-----  
Optimized Cartesian coordinates for **TS5**.

| Center<br>Number | Atomic<br>Number | Atomic<br>Type | Coordinates (Angstroms) |           |           |
|------------------|------------------|----------------|-------------------------|-----------|-----------|
|                  |                  |                | X                       | Y         | Z         |
| 1                | 6                | 0              | 0.692042                | -0.320521 | -2.394625 |
| 2                | 6                | 0              | 1.942539                | 0.250548  | -1.971714 |
| 3                | 6                | 0              | 2.631285                | -0.784659 | -1.271541 |
| 4                | 6                | 0              | 1.848228                | -1.981972 | -1.297696 |
| 5                | 6                | 0              | 0.661194                | -1.696226 | -1.995229 |
| 6                | 1                | 0              | -0.075522               | 0.191647  | -2.958717 |
| 7                | 1                | 0              | 2.317132                | 1.235188  | -2.209602 |
| 8                | 1                | 0              | 3.595126                | -0.691161 | -0.789107 |
| 9                | 1                | 0              | 2.108558                | -2.915355 | -0.818671 |
| 10               | 1                | 0              | -0.153650               | -2.386876 | -2.161512 |
| 11               | 42               | 0              | 0.668334                | -0.136717 | -0.123714 |
| 12               | 7                | 0              | -1.450031               | -0.302381 | -0.115725 |
| 13               | 7                | 0              | -0.543878               | 1.676151  | -0.012057 |
| 14               | 6                | 0              | -2.425641               | -1.383682 | -0.271635 |
| 15               | 6                | 0              | -3.070582               | -1.433712 | -1.670675 |
| 16               | 6                | 0              | -0.353690               | 3.110612  | 0.162418  |
| 17               | 6                | 0              | 0.888101                | 3.574997  | -0.606343 |
| 18               | 6                | 0              | -1.691154               | 1.031876  | -0.063603 |
| 19               | 6                | 0              | -3.053976               | 1.682794  | -0.032546 |
| 20               | 1                | 0              | -3.662804               | -2.348578 | -1.782359 |
| 21               | 1                | 0              | -2.308858               | -1.424326 | -2.455264 |
| 22               | 1                | 0              | -3.741140               | -0.587149 | -1.848592 |
| 23               | 1                | 0              | 1.020858                | 4.655907  | -0.494022 |
| 24               | 1                | 0              | 0.792803                | 3.350931  | -1.673577 |
| 25               | 1                | 0              | 1.782680                | 3.074630  | -0.224871 |
| 26               | 1                | 0              | -2.997384               | 2.723227  | -0.355835 |
| 27               | 1                | 0              | -3.452032               | 1.670235  | 0.987664  |
| 28               | 1                | 0              | -3.763428               | 1.160806  | -0.674711 |
| 29               | 6                | 0              | -3.489615               | -1.433014 | 0.841868  |
| 30               | 1                | 0              | -3.024123               | -1.360012 | 1.828129  |
| 31               | 1                | 0              | -4.228172               | -0.631717 | 0.752565  |
| 32               | 1                | 0              | -4.032380               | -2.382944 | 0.792379  |

|    |   |   |           |           |           |
|----|---|---|-----------|-----------|-----------|
| 33 | 1 | 0 | -1.829698 | -2.296762 | -0.167286 |
| 34 | 1 | 0 | -1.219121 | 3.645935  | -0.256684 |
| 35 | 6 | 0 | -0.248591 | 3.461813  | 1.656767  |
| 36 | 1 | 0 | -1.155958 | 3.165371  | 2.193251  |
| 37 | 1 | 0 | 0.598513  | 2.936744  | 2.105951  |
| 38 | 1 | 0 | -0.110305 | 4.540452  | 1.791405  |
| 39 | 6 | 0 | 2.052980  | -0.557269 | 1.417622  |
| 40 | 8 | 0 | 2.771484  | -1.356129 | 1.967503  |
| 41 | 8 | 0 | 1.787570  | 0.692628  | 1.483336  |
| 42 | 6 | 0 | -0.260512 | -1.862138 | 2.228973  |
| 43 | 8 | 0 | -0.471171 | -2.980395 | 2.314065  |

-----  
Optimized Cartesian coordinates for **Int8**.

| Center<br>Number | Atomic<br>Number | Atomic<br>Type | Coordinates (Angstroms) |           |           |
|------------------|------------------|----------------|-------------------------|-----------|-----------|
|                  |                  |                | X                       | Y         | Z         |
| 1                | 6                | 0              | 0.429564                | -2.586381 | -1.488867 |
| 2                | 6                | 0              | 1.495618                | -1.769974 | -1.960969 |
| 3                | 6                | 0              | 2.592100                | -1.968254 | -1.097286 |
| 4                | 6                | 0              | 2.222289                | -2.928453 | -0.099070 |
| 5                | 6                | 0              | 0.877660                | -3.324588 | -0.350650 |
| 6                | 1                | 0              | -0.553706               | -2.648392 | -1.930882 |
| 7                | 1                | 0              | 1.455139                | -1.093015 | -2.802610 |
| 8                | 1                | 0              | 3.541021                | -1.450882 | -1.146290 |
| 9                | 1                | 0              | 2.865116                | -3.322932 | 0.675234  |
| 10               | 1                | 0              | 0.323070                | -4.082596 | 0.183972  |
| 11               | 42               | 0              | 0.784083                | -1.067006 | 0.339740  |
| 12               | 7                | 0              | -1.372707               | -0.811483 | 0.055436  |
| 13               | 7                | 0              | -0.034254               | 0.873948  | -0.240059 |
| 14               | 6                | 0              | -2.561811               | -1.603276 | 0.384051  |
| 15               | 6                | 0              | -3.385769               | -2.007929 | -0.854448 |
| 16               | 6                | 0              | 0.455109                | 2.197153  | -0.612884 |
| 17               | 6                | 0              | 1.660435                | 2.090283  | -1.556759 |
| 18               | 6                | 0              | -1.295019               | 0.478125  | -0.304085 |
| 19               | 6                | 0              | -2.443316               | 1.356480  | -0.747109 |
| 20               | 1                | 0              | -4.167795               | -2.718703 | -0.566320 |
| 21               | 1                | 0              | -2.756604               | -2.488431 | -1.609040 |
| 22               | 1                | 0              | -3.877320               | -1.152004 | -1.326608 |
| 23               | 1                | 0              | 2.012626                | 3.087782  | -1.839879 |
| 24               | 1                | 0              | 1.393332                | 1.551280  | -2.471382 |
| 25               | 1                | 0              | 2.484633                | 1.562094  | -1.069355 |
| 26               | 1                | 0              | -2.262934               | 1.738913  | -1.756940 |
| 27               | 1                | 0              | -2.547581               | 2.219673  | -0.081982 |

|    |   |   |           |           |           |
|----|---|---|-----------|-----------|-----------|
| 28 | 1 | 0 | -3.386595 | 0.816018  | -0.756699 |
| 29 | 6 | 0 | -3.445416 | -0.976649 | 1.479509  |
| 30 | 1 | 0 | -2.849072 | -0.732082 | 2.360954  |
| 31 | 1 | 0 | -3.948908 | -0.066892 | 1.139091  |
| 32 | 1 | 0 | -4.222375 | -1.687259 | 1.781468  |
| 33 | 1 | 0 | -2.159922 | -2.531956 | 0.804452  |
| 34 | 1 | 0 | -0.340803 | 2.729339  | -1.152932 |
| 35 | 6 | 0 | 0.800337  | 3.011086  | 0.645543  |
| 36 | 1 | 0 | -0.071711 | 3.102061  | 1.300885  |
| 37 | 1 | 0 | 1.598067  | 2.518691  | 1.207841  |
| 38 | 1 | 0 | 1.132747  | 4.019425  | 0.374365  |
| 39 | 6 | 0 | 0.020386  | -1.283262 | 2.128578  |
| 40 | 8 | 0 | -0.474396 | -1.504784 | 3.160659  |
| 41 | 6 | 0 | 2.429758  | -0.899923 | 1.875927  |
| 42 | 8 | 0 | 2.918871  | -1.438894 | 2.823074  |
| 43 | 8 | 0 | 2.527278  | 0.075377  | 1.104189  |

-----  
Optimized Cartesian coordinates for **TS6**.  
-----

| Center<br>Number | Atomic<br>Number | Atomic<br>Type | Coordinates (Angstroms) |           |           |
|------------------|------------------|----------------|-------------------------|-----------|-----------|
|                  |                  |                | X                       | Y         | Z         |
| 1                | 6                | 0              | -0.042975               | -1.556633 | -2.199689 |
| 2                | 6                | 0              | 0.914258                | -0.587112 | -2.595192 |
| 3                | 6                | 0              | 2.108927                | -0.856036 | -1.885537 |
| 4                | 6                | 0              | 1.909253                | -2.020107 | -1.069421 |
| 5                | 6                | 0              | 0.563716                | -2.459871 | -1.273914 |
| 6                | 1                | 0              | -1.066710               | -1.605244 | -2.543949 |
| 7                | 1                | 0              | 0.746380                | 0.233333  | -3.278885 |
| 8                | 1                | 0              | 3.022267                | -0.277808 | -1.949199 |
| 9                | 1                | 0              | 2.663391                | -2.537933 | -0.492237 |
| 10               | 1                | 0              | 0.113478                | -3.351110 | -0.860035 |
| 11               | 42               | 0              | 0.483712                | -0.425410 | -0.122659 |
| 12               | 7                | 0              | -1.657907               | -0.182991 | -0.010535 |
| 13               | 7                | 0              | -0.399261               | 1.589143  | -0.081602 |
| 14               | 6                | 0              | -2.764032               | -1.092477 | 0.288584  |
| 15               | 6                | 0              | -3.841802               | -1.129604 | -0.812535 |
| 16               | 6                | 0              | -0.027354               | 2.984499  | -0.285807 |
| 17               | 6                | 0              | 1.037631                | 3.117934  | -1.383548 |
| 18               | 6                | 0              | -1.655831               | 1.153267  | -0.046400 |
| 19               | 6                | 0              | -2.872270               | 2.053640  | -0.074636 |
| 20               | 1                | 0              | -4.541330               | -1.951642 | -0.625203 |
| 21               | 1                | 0              | -3.387950               | -1.288027 | -1.795697 |
| 22               | 1                | 0              | -4.425978               | -0.205867 | -0.860263 |

|    |   |   |           |           |           |
|----|---|---|-----------|-----------|-----------|
| 23 | 1 | 0 | 1.304300  | 4.169769  | -1.533638 |
| 24 | 1 | 0 | 0.670292  | 2.718925  | -2.333908 |
| 25 | 1 | 0 | 1.946788  | 2.572760  | -1.111719 |
| 26 | 1 | 0 | -3.025867 | 2.468303  | -1.077969 |
| 27 | 1 | 0 | -2.749753 | 2.893393  | 0.615233  |
| 28 | 1 | 0 | -3.776086 | 1.516481  | 0.204576  |
| 29 | 6 | 0 | -3.365661 | -0.883418 | 1.690612  |
| 30 | 1 | 0 | -2.580210 | -0.922850 | 2.448642  |
| 31 | 1 | 0 | -3.883975 | 0.076264  | 1.781067  |
| 32 | 1 | 0 | -4.093041 | -1.673103 | 1.909443  |
| 33 | 1 | 0 | -2.299929 | -2.084994 | 0.297288  |
| 34 | 1 | 0 | -0.908917 | 3.549203  | -0.620999 |
| 35 | 6 | 0 | 0.456347  | 3.611144  | 1.033845  |
| 36 | 1 | 0 | -0.314922 | 3.535461  | 1.806715  |
| 37 | 1 | 0 | 1.347574  | 3.091385  | 1.397897  |
| 38 | 1 | 0 | 0.704577  | 4.669842  | 0.896926  |
| 39 | 6 | 0 | 0.202540  | -1.199105 | 1.623620  |
| 40 | 8 | 0 | -0.001288 | -1.749521 | 2.643044  |
| 41 | 6 | 0 | 2.832978  | -0.131602 | 1.513955  |
| 42 | 8 | 0 | 3.342014  | -0.850624 | 2.277033  |
| 43 | 8 | 0 | 2.461992  | 0.719778  | 0.772691  |

-----  
Optimized Cartesian coordinates for **Int9**.

| Center<br>Number | Atomic<br>Number | Atomic<br>Type | Coordinates (Angstroms) |           |           |
|------------------|------------------|----------------|-------------------------|-----------|-----------|
|                  |                  |                | X                       | Y         | Z         |
| 1                | 6                | 0              | 0.177002                | -1.534937 | -2.416056 |
| 2                | 6                | 0              | 1.145611                | -0.525994 | -2.640015 |
| 3                | 6                | 0              | 2.258260                | -0.806993 | -1.806852 |
| 4                | 6                | 0              | 2.004495                | -2.022336 | -1.091754 |
| 5                | 6                | 0              | 0.699505                | -2.475471 | -1.472005 |
| 6                | 1                | 0              | -0.797817               | -1.586450 | -2.881453 |
| 7                | 1                | 0              | 1.036674                | 0.326976  | -3.295529 |
| 8                | 1                | 0              | 3.154000                | -0.203673 | -1.727036 |
| 9                | 1                | 0              | 2.700703                | -2.545532 | -0.451085 |
| 10               | 1                | 0              | 0.231702                | -3.401156 | -1.167602 |
| 11               | 42               | 0              | 0.446985                | -0.538074 | -0.225143 |
| 12               | 7                | 0              | -1.697081               | -0.406184 | -0.243202 |
| 13               | 7                | 0              | -0.555814               | 1.452414  | -0.206526 |
| 14               | 6                | 0              | -2.765439               | -1.387586 | -0.054596 |
| 15               | 6                | 0              | -3.768507               | -1.445707 | -1.222794 |
| 16               | 6                | 0              | -0.300873               | 2.869405  | -0.473267 |
| 17               | 6                | 0              | 1.016258                | 3.059608  | -1.235274 |



|    |   |   |           |           |           |
|----|---|---|-----------|-----------|-----------|
| 18 | 6 | 0 | -1.780906 | 0.923884  | -0.285414 |
| 19 | 6 | 0 | -3.049245 | 1.732231  | -0.455625 |
| 20 | 1 | 0 | -4.420711 | -2.319036 | -1.112730 |
| 21 | 1 | 0 | -3.244468 | -1.534010 | -2.179675 |
| 22 | 1 | 0 | -4.410193 | -0.561395 | -1.272055 |
| 23 | 1 | 0 | 1.190536  | 4.121944  | -1.436940 |
| 24 | 1 | 0 | 0.995854  | 2.528283  | -2.190374 |
| 25 | 1 | 0 | 1.863660  | 2.681287  | -0.654704 |
| 26 | 1 | 0 | -3.216854 | 1.972919  | -1.512734 |
| 27 | 1 | 0 | -2.993918 | 2.674109  | 0.094763  |
| 28 | 1 | 0 | -3.921039 | 1.185782  | -0.099650 |
| 29 | 6 | 0 | -3.460555 | -1.262774 | 1.313454  |
| 30 | 1 | 0 | -2.719188 | -1.288073 | 2.115758  |
| 31 | 1 | 0 | -4.034251 | -0.334993 | 1.405143  |
| 32 | 1 | 0 | -4.155247 | -2.096926 | 1.461941  |
| 33 | 1 | 0 | -2.245773 | -2.351765 | -0.048363 |
| 34 | 1 | 0 | -1.100767 | 3.269745  | -1.113862 |
| 35 | 6 | 0 | -0.299144 | 3.692433  | 0.828590  |
| 36 | 1 | 0 | -1.231644 | 3.559233  | 1.384950  |
| 37 | 1 | 0 | 0.520947  | 3.386888  | 1.486730  |
| 38 | 1 | 0 | -0.177208 | 4.760188  | 0.613889  |
| 39 | 6 | 0 | 0.163297  | -1.501512 | 1.424402  |
| 40 | 8 | 0 | -0.006650 | -2.171060 | 2.377014  |
| 41 | 6 | 0 | 1.682212  | 0.910730  | 2.084943  |
| 42 | 8 | 0 | 1.311291  | 1.214022  | 3.145335  |
| 43 | 8 | 0 | 2.173470  | 0.658797  | 1.037933  |

-----  
Optimized Cartesian coordinates for **TS7**.  
-----

| Center<br>Number | Atomic<br>Number | Atomic<br>Type | Coordinates (Angstroms) |           |           |
|------------------|------------------|----------------|-------------------------|-----------|-----------|
|                  |                  |                | X                       | Y         | Z         |
| 1                | 6                | 0              | 0.794403                | -1.400688 | 2.358212  |
| 2                | 6                | 0              | -0.554095               | -1.375585 | 1.937721  |
| 3                | 6                | 0              | -0.745806               | -2.390770 | 0.940390  |
| 4                | 6                | 0              | 0.508969                | -3.048688 | 0.749667  |
| 5                | 6                | 0              | 1.454383                | -2.415031 | 1.611985  |
| 6                | 1                | 0              | 1.250438                | -0.750779 | 3.092486  |
| 7                | 1                | 0              | -1.311848               | -0.697780 | 2.302695  |
| 8                | 1                | 0              | -1.687121               | -2.670230 | 0.489203  |
| 9                | 1                | 0              | 0.693002                | -3.907514 | 0.119400  |
| 10               | 1                | 0              | 2.499539                | -2.679308 | 1.712071  |
| 11               | 42               | 0              | 0.655936                | -0.862637 | -0.100633 |
| 12               | 7                | 0              | 1.236453                | 1.269523  | -0.047824 |

|    |   |   |           |           |           |
|----|---|---|-----------|-----------|-----------|
| 13 | 7 | 0 | -0.843399 | 0.692291  | -0.358455 |
| 14 | 6 | 0 | 2.408578  | 2.051591  | 0.355254  |
| 15 | 6 | 0 | 2.257701  | 2.764738  | 1.712963  |
| 16 | 6 | 0 | -2.264662 | 0.853816  | -0.665536 |
| 17 | 6 | 0 | -3.143894 | 0.740378  | 0.593995  |
| 18 | 6 | 0 | -0.007736 | 1.721430  | -0.198367 |
| 19 | 6 | 0 | -0.458156 | 3.166826  | -0.237284 |
| 20 | 1 | 0 | 3.221447  | 3.178618  | 2.029343  |
| 21 | 1 | 0 | 1.926528  | 2.055018  | 2.477540  |
| 22 | 1 | 0 | 1.539700  | 3.589072  | 1.685975  |
| 23 | 1 | 0 | -4.183233 | 0.996822  | 0.360565  |
| 24 | 1 | 0 | -2.796752 | 1.413677  | 1.384577  |
| 25 | 1 | 0 | -3.135393 | -0.281335 | 0.986336  |
| 26 | 1 | 0 | -1.274340 | 3.346563  | 0.469523  |
| 27 | 1 | 0 | -0.826854 | 3.422855  | -1.237009 |
| 28 | 1 | 0 | 0.352979  | 3.850536  | -0.001543 |
| 29 | 6 | 0 | 2.915992  | 2.988189  | -0.758279 |
| 30 | 1 | 0 | 3.027298  | 2.433771  | -1.694812 |
| 31 | 1 | 0 | 2.237582  | 3.825808  | -0.944518 |
| 32 | 1 | 0 | 3.891784  | 3.406275  | -0.486914 |
| 33 | 1 | 0 | 3.199936  | 1.312438  | 0.506339  |
| 34 | 1 | 0 | -2.408134 | 1.865190  | -1.068934 |
| 35 | 6 | 0 | -2.742449 | -0.122863 | -1.745855 |
| 36 | 1 | 0 | -2.170758 | -0.006739 | -2.668709 |
| 37 | 1 | 0 | -2.639482 | -1.160633 | -1.414571 |
| 38 | 1 | 0 | -3.799870 | 0.057238  | -1.967911 |
| 39 | 6 | 0 | 0.205214  | -1.328324 | -1.934244 |
| 40 | 8 | 0 | -0.050976 | -1.684768 | -3.017641 |
| 41 | 7 | 0 | 2.787895  | -1.351687 | -1.257743 |
| 42 | 7 | 0 | 3.355692  | -1.098624 | -0.285194 |
| 43 | 8 | 0 | 4.176176  | -0.904774 | 0.570646  |

-----  
Optimized Cartesian coordinates for **Int10**.

| Center<br>Number | Atomic<br>Number | Atomic<br>Type | Coordinates (Angstroms) |           |           |
|------------------|------------------|----------------|-------------------------|-----------|-----------|
|                  |                  |                | X                       | Y         | Z         |
| 1                | 6                | 0              | 0.883076                | -1.046134 | -2.672556 |
| 2                | 6                | 0              | 1.842225                | -0.017265 | -2.525934 |
| 3                | 6                | 0              | 2.851292                | -0.456725 | -1.609658 |
| 4                | 6                | 0              | 2.499210                | -1.774817 | -1.181488 |
| 5                | 6                | 0              | 1.269401                | -2.120433 | -1.827849 |
| 6                | 1                | 0              | -0.006540               | -1.005531 | -3.286158 |
| 7                | 1                | 0              | 1.813180                | 0.942191  | -3.021245 |

|    |    |   |           |           |           |
|----|----|---|-----------|-----------|-----------|
| 8  | 1  | 0 | 3.754996  | 0.077913  | -1.352222 |
| 9  | 1  | 0 | 3.089107  | -2.419159 | -0.544568 |
| 10 | 1  | 0 | 0.738970  | -3.057698 | -1.717368 |
| 11 | 42 | 0 | 0.932073  | -0.299599 | -0.274955 |
| 12 | 7  | 0 | -1.108614 | 0.511340  | -0.312830 |
| 13 | 7  | 0 | 0.590262  | 1.870533  | -0.324449 |
| 14 | 6  | 0 | -2.447548 | -0.060074 | -0.410668 |
| 15 | 6  | 0 | -3.135852 | 0.180745  | -1.768009 |
| 16 | 6  | 0 | 1.313967  | 3.140294  | -0.301176 |
| 17 | 6  | 0 | 1.743956  | 3.586543  | -1.711478 |
| 18 | 6  | 0 | -0.740922 | 1.788909  | -0.377322 |
| 19 | 6  | 0 | -1.650651 | 2.996784  | -0.452723 |
| 20 | 1  | 0 | -4.057745 | -0.407503 | -1.835874 |
| 21 | 1  | 0 | -2.477624 | -0.122298 | -2.588015 |
| 22 | 1  | 0 | -3.403721 | 1.229793  | -1.924073 |
| 23 | 1  | 0 | 2.177790  | 4.592450  | -1.682724 |
| 24 | 1  | 0 | 0.895044  | 3.601617  | -2.402744 |
| 25 | 1  | 0 | 2.502178  | 2.909156  | -2.117506 |
| 26 | 1  | 0 | -1.343842 | 3.671935  | -1.257099 |
| 27 | 1  | 0 | -1.610761 | 3.563698  | 0.484531  |
| 28 | 1  | 0 | -2.686317 | 2.712707  | -0.624982 |
| 29 | 6  | 0 | -3.352311 | 0.308122  | 0.781076  |
| 30 | 1  | 0 | -2.834201 | 0.110606  | 1.724172  |
| 31 | 1  | 0 | -3.641404 | 1.363194  | 0.772648  |
| 32 | 1  | 0 | -4.271907 | -0.287276 | 0.761386  |
| 33 | 1  | 0 | -2.285948 | -1.143370 | -0.346790 |
| 34 | 1  | 0 | 0.638285  | 3.912270  | 0.093906  |
| 35 | 6  | 0 | 2.524667  | 3.086535  | 0.635766  |
| 36 | 1  | 0 | 2.227617  | 2.828794  | 1.654271  |
| 37 | 1  | 0 | 3.247227  | 2.337599  | 0.296683  |
| 38 | 1  | 0 | 3.027907  | 4.059242  | 0.655343  |
| 39 | 6  | 0 | 1.881501  | 0.042055  | 1.394100  |
| 40 | 8  | 0 | 2.490694  | 0.193042  | 2.381917  |
| 41 | 7  | 0 | 0.024084  | -1.782017 | 0.948750  |
| 42 | 7  | 0 | -0.455892 | -2.604772 | 1.572309  |
| 43 | 8  | 0 | -0.961821 | -3.475912 | 2.230792  |

-----  
Optimized Cartesian coordinates for **TS8**.

| Center<br>Number | Atomic<br>Number | Atomic<br>Type | Coordinates (Angstroms) |           |           |
|------------------|------------------|----------------|-------------------------|-----------|-----------|
|                  |                  |                | X                       | Y         | Z         |
| 1                | 6                | 0              | 0.980081                | -2.449880 | -1.018949 |
| 2                | 6                | 0              | 1.944855                | -1.585648 | -1.580009 |

|    |    |   |           |           |           |
|----|----|---|-----------|-----------|-----------|
| 3  | 6  | 0 | 2.838414  | -1.177634 | -0.553505 |
| 4  | 6  | 0 | 2.439010  | -1.839002 | 0.661106  |
| 5  | 6  | 0 | 1.275299  | -2.622372 | 0.368919  |
| 6  | 1  | 0 | 0.136213  | -2.878627 | -1.541055 |
| 7  | 1  | 0 | 1.948014  | -1.225345 | -2.598633 |
| 8  | 1  | 0 | 3.692290  | -0.526169 | -0.667857 |
| 9  | 1  | 0 | 2.958835  | -1.791332 | 1.607663  |
| 10 | 1  | 0 | 0.735656  | -3.253970 | 1.060878  |
| 11 | 42 | 0 | 0.770278  | -0.352088 | 0.223773  |
| 12 | 7  | 0 | -1.320240 | -0.348967 | -0.413537 |
| 13 | 7  | 0 | 0.166153  | 0.997188  | -1.291892 |
| 14 | 6  | 0 | -2.556189 | -1.042760 | -0.039633 |
| 15 | 6  | 0 | -3.221177 | -1.755548 | -1.231530 |
| 16 | 6  | 0 | 0.682750  | 2.218386  | -1.914741 |
| 17 | 6  | 0 | 2.048341  | 1.959676  | -2.558508 |
| 18 | 6  | 0 | -1.146103 | 0.689248  | -1.217020 |
| 19 | 6  | 0 | -2.213345 | 1.473622  | -1.943206 |
| 20 | 1  | 0 | -4.032936 | -2.399919 | -0.877887 |
| 21 | 1  | 0 | -2.497889 | -2.381484 | -1.763782 |
| 22 | 1  | 0 | -3.650701 | -1.052885 | -1.952207 |
| 23 | 1  | 0 | 2.417362  | 2.869130  | -3.043048 |
| 24 | 1  | 0 | 1.985952  | 1.172020  | -3.315711 |
| 25 | 1  | 0 | 2.779323  | 1.659520  | -1.801678 |
| 26 | 1  | 0 | -1.994796 | 1.512206  | -3.015054 |
| 27 | 1  | 0 | -2.242733 | 2.503603  | -1.574072 |
| 28 | 1  | 0 | -3.198205 | 1.034468  | -1.806628 |
| 29 | 6  | 0 | -3.547684 | -0.175726 | 0.755883  |
| 30 | 1  | 0 | -3.055984 | 0.286302  | 1.614756  |
| 31 | 1  | 0 | -3.989997 | 0.618173  | 0.146198  |
| 32 | 1  | 0 | -4.367674 | -0.799989 | 1.127368  |
| 33 | 1  | 0 | -2.218147 | -1.829244 | 0.644871  |
| 34 | 1  | 0 | -0.008483 | 2.500865  | -2.721192 |
| 35 | 6  | 0 | 0.754020  | 3.389693  | -0.920106 |
| 36 | 1  | 0 | -0.212265 | 3.564143  | -0.437951 |
| 37 | 1  | 0 | 1.485752  | 3.187530  | -0.132767 |
| 38 | 1  | 0 | 1.053784  | 4.309238  | -1.435112 |
| 39 | 7  | 0 | -0.651266 | 1.613298  | 2.212955  |
| 40 | 8  | 0 | -1.371469 | 1.364111  | 3.172827  |
| 41 | 7  | 0 | 0.178265  | 0.663662  | 1.799381  |
| 42 | 6  | 0 | 1.742120  | 0.939820  | 1.407198  |
| 43 | 8  | 0 | 2.511519  | 1.614567  | 2.003585  |

-----  
Optimized Cartesian coordinates for **Int11**.  
-----

| Center<br>Number | Atomic<br>Number | Atomic<br>Type | Coordinates (Angstroms) |           |           |
|------------------|------------------|----------------|-------------------------|-----------|-----------|
|                  |                  |                | X                       | Y         | Z         |
| 1                | 6                | 0              | -0.470650               | -1.457017 | 2.464215  |
| 2                | 6                | 0              | -1.600802               | -2.018178 | 1.834740  |
| 3                | 6                | 0              | -1.175145               | -3.070166 | 0.978006  |
| 4                | 6                | 0              | 0.249048                | -3.192699 | 1.121852  |
| 5                | 6                | 0              | 0.690722                | -2.177737 | 2.038594  |
| 6                | 1                | 0              | -0.473269               | -0.602882 | 3.127357  |
| 7                | 1                | 0              | -2.611339               | -1.645643 | 1.917670  |
| 8                | 1                | 0              | -1.801960               | -3.696887 | 0.360980  |
| 9                | 1                | 0              | 0.863821                | -3.946891 | 0.650080  |
| 10               | 1                | 0              | 1.701205                | -2.016620 | 2.388247  |
| 11               | 42               | 0              | -0.043228               | -1.197029 | 0.089465  |
| 12               | 7                | 0              | 0.251672                | 0.963759  | 0.319863  |
| 13               | 7                | 0              | -1.601323               | 0.090681  | -0.455486 |
| 14               | 6                | 0              | 1.273482                | 1.873219  | 0.845400  |
| 15               | 6                | 0              | 0.766440                | 2.716252  | 2.029202  |
| 16               | 6                | 0              | -2.821526               | 0.014463  | -1.266806 |
| 17               | 6                | 0              | -3.843982               | -0.940333 | -0.641718 |
| 18               | 6                | 0              | -0.914833               | 1.240582  | -0.229139 |
| 19               | 6                | 0              | -1.450580               | 2.600280  | -0.613226 |
| 20               | 1                | 0              | 1.600483                | 3.255775  | 2.490160  |
| 21               | 1                | 0              | 0.310417                | 2.078451  | 2.793035  |
| 22               | 1                | 0              | 0.023279                | 3.459391  | 1.723918  |
| 23               | 1                | 0              | -4.754775               | -0.965065 | -1.248351 |
| 24               | 1                | 0              | -4.117594               | -0.618218 | 0.367876  |
| 25               | 1                | 0              | -3.446662               | -1.958091 | -0.589396 |
| 26               | 1                | 0              | -2.438916               | 2.761911  | -0.171645 |
| 27               | 1                | 0              | -1.557841               | 2.673449  | -1.700468 |
| 28               | 1                | 0              | -0.788527               | 3.397286  | -0.284377 |
| 29               | 6                | 0              | 1.965538                | 2.721746  | -0.234542 |
| 30               | 1                | 0              | 2.313939                | 2.082076  | -1.048080 |
| 31               | 1                | 0              | 1.305133                | 3.487573  | -0.653208 |
| 32               | 1                | 0              | 2.831069                | 3.235741  | 0.197627  |
| 33               | 1                | 0              | 2.041133                | 1.201199  | 1.245624  |
| 34               | 1                | 0              | -3.278512               | 1.013057  | -1.274935 |
| 35               | 6                | 0              | -2.513507               | -0.374430 | -2.722104 |
| 36               | 1                | 0              | -1.791469               | 0.314870  | -3.171412 |
| 37               | 1                | 0              | -2.095694               | -1.383884 | -2.776646 |
| 38               | 1                | 0              | -3.427532               | -0.349352 | -3.325710 |
| 39               | 6                | 0              | 0.213972                | -2.303581 | -1.643129 |
| 40               | 8                | 0              | -0.015663               | -3.250094 | -2.361533 |
| 41               | 7                | 0              | 1.049700                | -1.216039 | -1.647791 |

|    |   |   |          |           |           |
|----|---|---|----------|-----------|-----------|
| 42 | 7 | 0 | 1.519568 | -0.591079 | -2.800225 |
| 43 | 8 | 0 | 2.354036 | 0.258278  | -2.599075 |

-----  
Optimized Cartesian coordinates for **TS9**.  
-----

| Center<br>Number | Atomic<br>Number | Atomic<br>Type | Coordinates (Angstroms) |           |           |
|------------------|------------------|----------------|-------------------------|-----------|-----------|
|                  |                  |                | X                       | Y         | Z         |
| 1                | 6                | 0              | -0.683115               | -1.382670 | -2.336307 |
| 2                | 6                | 0              | 0.374058                | -0.446469 | -2.469497 |
| 3                | 6                | 0              | 1.549290                | -0.987965 | -1.850431 |
| 4                | 6                | 0              | 1.211412                | -2.302136 | -1.355982 |
| 5                | 6                | 0              | -0.185760               | -2.537339 | -1.640823 |
| 6                | 1                | 0              | -1.698876               | -1.240229 | -2.671442 |
| 7                | 1                | 0              | 0.291055                | 0.532003  | -2.915539 |
| 8                | 1                | 0              | 2.526032                | -0.532659 | -1.826664 |
| 9                | 1                | 0              | 1.895185                | -3.003533 | -0.902990 |
| 10               | 1                | 0              | -0.740603               | -3.439434 | -1.435058 |
| 11               | 42               | 0              | 0.031346                | -0.824679 | -0.044270 |
| 12               | 7                | 0              | -2.003944               | -0.133298 | 0.343843  |
| 13               | 7                | 0              | -0.268099               | 1.172297  | 0.206979  |
| 14               | 6                | 0              | -3.348070               | -0.744025 | 0.465292  |
| 15               | 6                | 0              | -4.338478               | -0.188715 | -0.584720 |
| 16               | 6                | 0              | 0.516608                | 2.437205  | 0.259068  |
| 17               | 6                | 0              | 1.728872                | 2.369089  | -0.687834 |
| 18               | 6                | 0              | -1.637086               | 1.128445  | 0.459208  |
| 19               | 6                | 0              | -2.457361               | 2.350219  | 0.793857  |
| 20               | 1                | 0              | -5.264042               | -0.774312 | -0.565800 |
| 21               | 1                | 0              | -3.900973               | -0.254365 | -1.586230 |
| 22               | 1                | 0              | -4.589153               | 0.856700  | -0.382110 |
| 23               | 1                | 0              | 2.256106                | 3.329357  | -0.667920 |
| 24               | 1                | 0              | 1.414412                | 2.165403  | -1.715016 |
| 25               | 1                | 0              | 2.413957                | 1.587022  | -0.351269 |
| 26               | 1                | 0              | -2.478020               | 3.039130  | -0.059873 |
| 27               | 1                | 0              | -2.007443               | 2.873697  | 1.642911  |
| 28               | 1                | 0              | -3.480004               | 2.081511  | 1.053234  |
| 29               | 6                | 0              | -3.909088               | -0.658963 | 1.903479  |
| 30               | 1                | 0              | -3.173325               | -1.054270 | 2.607023  |
| 31               | 1                | 0              | -4.141691               | 0.374084  | 2.178993  |
| 32               | 1                | 0              | -4.828147               | -1.251087 | 1.974393  |
| 33               | 1                | 0              | -3.178290               | -1.801478 | 0.240284  |
| 34               | 1                | 0              | -0.138358               | 3.255131  | -0.072226 |
| 35               | 6                | 0              | 0.999917                | 2.735504  | 1.699308  |
| 36               | 1                | 0              | 0.171440                | 2.722088  | 2.410430  |

|    |   |   |           |           |          |
|----|---|---|-----------|-----------|----------|
| 37 | 1 | 0 | 1.722276  | 1.974177  | 2.002560 |
| 38 | 1 | 0 | 1.485790  | 3.717587  | 1.727258 |
| 39 | 7 | 0 | -0.559749 | -0.818183 | 2.593584 |
| 40 | 8 | 0 | -0.548274 | 0.338663  | 3.004739 |
| 41 | 7 | 0 | 0.865026  | -1.413904 | 1.779975 |
| 42 | 6 | 0 | 1.855001  | -0.701311 | 1.274920 |
| 43 | 8 | 0 | 2.958580  | -0.201252 | 1.363641 |

-----  
Optimized Cartesian coordinates for **TS10**.

| Center<br>Number | Atomic<br>Number | Atomic<br>Type | Coordinates (Angstroms) |           |           |
|------------------|------------------|----------------|-------------------------|-----------|-----------|
|                  |                  |                | X                       | Y         | Z         |
| 1                | 6                | 0              | 0.902965                | 0.485933  | -1.579315 |
| 2                | 6                | 0              | 1.751768                | 1.297994  | -0.804291 |
| 3                | 6                | 0              | 2.640452                | 0.458283  | -0.061987 |
| 4                | 6                | 0              | 2.329806                | -0.903675 | -0.415182 |
| 5                | 6                | 0              | 1.224208                | -0.884288 | -1.337634 |
| 6                | 1                | 0              | 0.094461                | 0.840113  | -2.204757 |
| 7                | 1                | 0              | 1.709206                | 2.376758  | -0.746297 |
| 8                | 1                | 0              | 3.459608                | 0.795903  | 0.557911  |
| 9                | 1                | 0              | 2.877542                | -1.786748 | -0.111765 |
| 10               | 1                | 0              | 0.793371                | -1.738486 | -1.841420 |
| 11               | 42               | 0              | 0.566848                | -0.165159 | 0.781789  |
| 12               | 7                | 0              | -1.449831               | 0.322636  | 0.476964  |
| 13               | 7                | 0              | -0.278242               | 1.613828  | 1.768097  |
| 14               | 6                | 0              | -2.520733               | -0.262588 | -0.329247 |
| 15               | 6                | 0              | -3.143199               | 0.685322  | -1.371249 |
| 16               | 6                | 0              | 0.123455                | 2.754260  | 2.584526  |
| 17               | 6                | 0              | 0.525832                | 3.971322  | 1.732992  |
| 18               | 6                | 0              | -1.464495               | 1.465661  | 1.198377  |
| 19               | 6                | 0              | -2.628765               | 2.417497  | 1.339189  |
| 20               | 1                | 0              | -3.761828               | 0.113126  | -2.070872 |
| 21               | 1                | 0              | -2.366469               | 1.196013  | -1.949039 |
| 22               | 1                | 0              | -3.785070               | 1.446039  | -0.918302 |
| 23               | 1                | 0              | 0.762679                | 4.829339  | 2.371784  |
| 24               | 1                | 0              | -0.278406               | 4.267749  | 1.052292  |
| 25               | 1                | 0              | 1.412573                | 3.743069  | 1.133189  |
| 26               | 1                | 0              | -2.663970               | 3.119962  | 0.498971  |
| 27               | 1                | 0              | -2.545611               | 3.002154  | 2.257598  |
| 28               | 1                | 0              | -3.577396               | 1.879253  | 1.363263  |
| 29               | 6                | 0              | -3.591974               | -0.943781 | 0.542104  |
| 30               | 1                | 0              | -3.124441               | -1.646213 | 1.237502  |
| 31               | 1                | 0              | -4.166034               | -0.218188 | 1.128033  |

|    |   |   |           |           |           |
|----|---|---|-----------|-----------|-----------|
| 32 | 1 | 0 | -4.299582 | -1.497198 | -0.084975 |
| 33 | 1 | 0 | -2.019767 | -1.060775 | -0.889158 |
| 34 | 1 | 0 | -0.729579 | 3.054652  | 3.212777  |
| 35 | 6 | 0 | 1.260357  | 2.343581  | 3.525526  |
| 36 | 1 | 0 | 0.959131  | 1.501236  | 4.153007  |
| 37 | 1 | 0 | 2.141012  | 2.037244  | 2.952272  |
| 38 | 1 | 0 | 1.542724  | 3.179349  | 4.174436  |
| 39 | 7 | 0 | -0.611493 | -1.446748 | 4.068038  |
| 40 | 8 | 0 | -1.108636 | -0.411456 | 3.968706  |
| 41 | 7 | 0 | 0.521165  | -1.501897 | 2.333822  |
| 42 | 6 | 0 | 0.995371  | -2.508663 | 1.785684  |
| 43 | 8 | 0 | 1.439290  | -3.559374 | 1.454248  |

-----  
Optimized Cartesian coordinates for **Int12**.

| Center<br>Number | Atomic<br>Number | Atomic<br>Type | Coordinates (Angstroms) |           |           |
|------------------|------------------|----------------|-------------------------|-----------|-----------|
|                  |                  |                | X                       | Y         | Z         |
| 1                | 6                | 0              | 0.179751                | -0.103617 | -2.636401 |
| 2                | 6                | 0              | 0.986672                | 0.819145  | -1.943386 |
| 3                | 6                | 0              | 2.026010                | 0.101771  | -1.266988 |
| 4                | 6                | 0              | 1.845914                | -1.295417 | -1.575693 |
| 5                | 6                | 0              | 0.685659                | -1.419034 | -2.412804 |
| 6                | 1                | 0              | -0.715416               | 0.137952  | -3.193998 |
| 7                | 1                | 0              | 0.820771                | 1.886351  | -1.889692 |
| 8                | 1                | 0              | 2.847682                | 0.541288  | -0.719463 |
| 9                | 1                | 0              | 2.501291                | -2.102629 | -1.276015 |
| 10               | 1                | 0              | 0.300374                | -2.330255 | -2.849324 |
| 11               | 42               | 0              | 0.114059                | -0.694789 | -0.238858 |
| 12               | 7                | 0              | -1.972099               | -0.395683 | -0.278758 |
| 13               | 7                | 0              | -0.716403               | 0.933805  | 0.897397  |
| 14               | 6                | 0              | -3.101143               | -1.056637 | -0.931954 |
| 15               | 6                | 0              | -3.950721               | -0.115910 | -1.805275 |
| 16               | 6                | 0              | -0.317379               | 1.959792  | 1.854909  |
| 17               | 6                | 0              | 0.917932                | 2.709417  | 1.344437  |
| 18               | 6                | 0              | -1.975204               | 0.635281  | 0.583872  |
| 19               | 6                | 0              | -3.182687               | 1.353030  | 1.143622  |
| 20               | 1                | 0              | -4.661433               | -0.696778 | -2.402903 |
| 21               | 1                | 0              | -3.314725               | 0.452083  | -2.491514 |
| 22               | 1                | 0              | -4.528687               | 0.599234  | -1.212548 |
| 23               | 1                | 0              | 1.220488                | 3.482441  | 2.058177  |
| 24               | 1                | 0              | 0.715497                | 3.190157  | 0.382509  |
| 25               | 1                | 0              | 1.754016                | 2.015905  | 1.212385  |
| 26               | 1                | 0              | -3.241973               | 2.371267  | 0.742628  |



|    |   |   |           |           |           |
|----|---|---|-----------|-----------|-----------|
| 27 | 1 | 0 | -3.110763 | 1.431118  | 2.232073  |
| 28 | 1 | 0 | -4.108927 | 0.837543  | 0.900557  |
| 29 | 6 | 0 | -3.950978 | -1.886080 | 0.047860  |
| 30 | 1 | 0 | -3.309077 | -2.550029 | 0.633449  |
| 31 | 1 | 0 | -4.514583 | -1.257939 | 0.744906  |
| 32 | 1 | 0 | -4.673304 | -2.499153 | -0.502163 |
| 33 | 1 | 0 | -2.626365 | -1.773527 | -1.611602 |
| 34 | 1 | 0 | -1.131110 | 2.692999  | 1.955112  |
| 35 | 6 | 0 | -0.056131 | 1.337264  | 3.236314  |
| 36 | 1 | 0 | -0.950456 | 0.835990  | 3.619809  |
| 37 | 1 | 0 | 0.740030  | 0.589777  | 3.167637  |
| 38 | 1 | 0 | 0.243881  | 2.104179  | 3.958996  |
| 39 | 7 | 0 | 0.326049  | -1.995603 | 1.281395  |
| 40 | 6 | 0 | 0.474484  | -2.784248 | 2.183395  |
| 41 | 8 | 0 | 0.622874  | -3.564965 | 3.067634  |

-----  
Optimized Cartesian coordinates for **Int13**.

| Center<br>Number | Atomic<br>Number | Atomic<br>Type | Coordinates (Angstroms) |           |           |
|------------------|------------------|----------------|-------------------------|-----------|-----------|
|                  |                  |                | X                       | Y         | Z         |
| 1                | 6                | 0              | -0.777669               | -1.646487 | -2.106274 |
| 2                | 6                | 0              | 0.445178                | -1.167448 | -2.648536 |
| 3                | 6                | 0              | 1.498470                | -1.850338 | -1.996592 |
| 4                | 6                | 0              | 0.940063                | -2.751433 | -1.044259 |
| 5                | 6                | 0              | -0.480587               | -2.632113 | -1.119150 |
| 6                | 1                | 0              | -1.765766               | -1.302279 | -2.374599 |
| 7                | 1                | 0              | 0.551193                | -0.396218 | -3.398588 |
| 8                | 1                | 0              | 2.553507                | -1.660760 | -2.130125 |
| 9                | 1                | 0              | 1.493133                | -3.422879 | -0.402441 |
| 10               | 1                | 0              | -1.198915               | -3.212008 | -0.556051 |
| 11               | 42               | 0              | 0.323585                | -0.625352 | -0.165693 |
| 12               | 7                | 0              | -1.698069               | 0.216098  | -0.030904 |
| 13               | 7                | 0              | -0.005094               | 1.548920  | -0.313114 |
| 14               | 6                | 0              | -2.929326               | -0.334664 | 0.543819  |
| 15               | 6                | 0              | -4.166755               | -0.084010 | -0.339737 |
| 16               | 6                | 0              | 0.734959                | 2.788566  | -0.554918 |
| 17               | 6                | 0              | 1.725593                | 2.614576  | -1.713144 |
| 18               | 6                | 0              | -1.312854               | 1.493001  | -0.100022 |
| 19               | 6                | 0              | -2.207426               | 2.705712  | 0.015035  |
| 20               | 1                | 0              | -5.013235               | -0.673994 | 0.027475  |
| 21               | 1                | 0              | -3.970217               | -0.378679 | -1.375141 |
| 22               | 1                | 0              | -4.475874               | 0.965141  | -0.344346 |
| 23               | 1                | 0              | 2.246020                | 3.557393  | -1.912444 |

|    |   |   |           |           |           |
|----|---|---|-----------|-----------|-----------|
| 24 | 1 | 0 | 1.201960  | 2.315120  | -2.627144 |
| 25 | 1 | 0 | 2.466918  | 1.849737  | -1.470167 |
| 26 | 1 | 0 | -1.767531 | 3.448104  | 0.686041  |
| 27 | 1 | 0 | -3.195435 | 2.446585  | 0.388094  |
| 28 | 1 | 0 | -2.330156 | 3.177582  | -0.966285 |
| 29 | 6 | 0 | -3.161241 | 0.060518  | 2.013232  |
| 30 | 1 | 0 | -2.289743 | -0.196776 | 2.619970  |
| 31 | 1 | 0 | -3.355633 | 1.131386  | 2.127557  |
| 32 | 1 | 0 | -4.026985 | -0.476895 | 2.415439  |
| 33 | 1 | 0 | -2.768372 | -1.418947 | 0.537347  |
| 34 | 1 | 0 | 0.011226  | 3.557631  | -0.861143 |
| 35 | 6 | 0 | 1.430551  | 3.289183  | 0.721816  |
| 36 | 1 | 0 | 0.709654  | 3.418278  | 1.535790  |
| 37 | 1 | 0 | 2.194752  | 2.585266  | 1.058148  |
| 38 | 1 | 0 | 1.912953  | 4.255515  | 0.537794  |
| 39 | 7 | 0 | 0.130063  | -1.164182 | 1.523679  |
| 40 | 8 | 0 | -0.018551 | -1.673303 | 2.588178  |
| 41 | 7 | 0 | 2.329091  | -0.128926 | 0.138685  |
| 42 | 6 | 0 | 3.178485  | 0.123328  | 0.955945  |
| 43 | 8 | 0 | 4.067976  | 0.408552  | 1.695642  |

-----  
Optimized Cartesian coordinates for CO.

| Center<br>Number | Atomic<br>Number | Atomic<br>Type | Coordinates (Angstroms) |          |          |
|------------------|------------------|----------------|-------------------------|----------|----------|
|                  |                  |                | X                       | Y        | Z        |
| 1                | 6                | 0              | -0.276319               | 2.000000 | 0.000000 |
| 2                | 8                | 0              | 0.861625                | 2.000000 | 0.000000 |

-----  
Optimized Cartesian coordinates for N<sub>2</sub>O.

| Center<br>Number | Atomic<br>Number | Atomic<br>Type | Coordinates (Angstroms) |           |          |
|------------------|------------------|----------------|-------------------------|-----------|----------|
|                  |                  |                | X                       | Y         | Z        |
| 1                | 7                | 0              | -1.362128               | 0.037138  | 1.153911 |
| 2                | 7                | 0              | -0.403257               | -0.240889 | 0.615522 |
| 3                | 8                | 0              | 0.604706                | -0.533150 | 0.049569 |

-----  
Optimized Cartesian coordinates for N<sub>2</sub>.

| Center<br>Number | Atomic<br>Number | Atomic<br>Type | Coordinates (Angstroms) |          |          |
|------------------|------------------|----------------|-------------------------|----------|----------|
|                  |                  |                | X                       | Y        | Z        |
| 1                | 7                | 0              | 0.357645                | 2.309533 | 0.119949 |

2            7            0            -0.747856    2.309533    0.119949

---

Optimized Cartesian coordinates for CO<sub>2</sub>.

---

| Center<br>Number | Atomic<br>Number | Atomic<br>Type | Coordinates (Angstroms) |          |          |
|------------------|------------------|----------------|-------------------------|----------|----------|
|                  |                  |                | X                       | Y        | Z        |
| 1                | 6                | 0              | -2.183674               | 1.397959 | 0.000000 |
| 2                | 8                | 0              | -3.352830               | 1.397959 | 0.000000 |
| 3                | 8                | 0              | -1.014518               | 1.397959 | 0.000000 |

---
